# Supplementary material for: Risk model based on genes regulating the response of tumor cells to T-cell-mediated killing in esophageal squamous cell carcinoma
Source: publisher site journal article supplement (doi:10.18632/aging.205495), 2024-02-01
Supplement: Supplementary file [file aging-v16i3-205495-supplementary-material-SD2.pdf]

## SUPPLEMENTARY TABLE

**Supplementary Table 1. Univariate Cox regression analysis screened genes with similar prognostic value.**

| <b>Genes</b> | <b>TCGA_ESCC</b> | <b>GSE53622</b> |
|--------------|------------------|-----------------|
| EIF3D        | 0.01467913       | 0.05363505      |
| SPTLC2       | 0.07938117       | 0.06810316      |
| EIF4H        | 0.01330395       | 0.02735845      |
| RGP1         | 0.00032109       | 0.07588607      |
| CDK2         | 0.04077468       | 0.08068879      |
| TMEM209      | 0.08931848       | 0.04622017      |
| CAPZA3       | 0.05082211       | 0.02880283      |
| TCEA1        | 0.03995525       | 0.02700871      |
