# Supplementary material for: Risk model based on genes regulating the response of tumor cells to T-cell-mediated killing in esophageal squamous cell carcinoma
Source: publisher site journal article supplement (doi:10.18632/aging.205495), 2024-02-01
Supplement: Supplementary file [file aging-v16i3-205495-supplementary-material-SD4.pdf]

**Supplementary Table 3. Primers used for real-time PCR.**

| <b>GENE</b> | <b>Forward (5'→3')</b>    | <b>Reverse (5'→3')</b>    |
|-------------|---------------------------|---------------------------|
| CDK2        | GACACGCTGCTGGATGTCA       | CGTAGTGCAGCATTGCGAT       |
| TCEA1       | CAAAGAAGCCATCAGAGAGCATCAG | TTGTCATTGGTTCATCAGCACTACG |
| TMEM209     | CTCGCTACCGTTCTTCACCTACC   | ACCCTATGCTGTTTCTCCTCTTCAC |
| GAPDH       | GGAGCGAGATCCCTCCAAAAT     | GGCTGTTGTCATACTTCTCATGG   |
