# Supplementary material for: Risk model based on genes regulating the response of tumor cells to T-cell-mediated killing in esophageal squamous cell carcinoma
Source: Aging (Albany NY). 2024 Feb 1;16(3):2494–516. doi: 10.18632/aging.205495 (PMC10911339; doi:10.18632/aging.205495)
Supplement: Supplementary Table 2 [file aging-16-205495-s003.xlsx]

## Sheet: Sheet1
Supplementary Table 2. Genes regulating the sensitivity of tumor cells to T cell-mediated killing .
No	Gene	Relation	Stat
1	JAK1	Sensitive to T cell-mediated killing	logFC: 9.69; FDR: 0.000150
1	STAT1	Sensitive to T cell-mediated killing	logFC: 8.49; FDR: 0.000150
1	IFNGR2	Sensitive to T cell-mediated killing	logFC: 4.87; FDR: 0.000150
1	IFNGR1	Sensitive to T cell-mediated killing	logFC: 4.68; FDR: 0.000150
1	B2M	Sensitive to T cell-mediated killing	logFC: 3.72; FDR: 0.000150
1	HLA-A	Sensitive to T cell-mediated killing	logFC: 3.53; FDR: 0.000150
1	JAK2	Sensitive to T cell-mediated killing	logFC: 3.10; FDR: 0.000150
1	LZTR1	Sensitive to T cell-mediated killing	logFC: 2.91; FDR: 0.000150
1	UBE2G2	Sensitive to T cell-mediated killing	logFC: 2.87; FDR: 0.000150
1	DUSP6	Sensitive to T cell-mediated killing	logFC: 2.83; FDR: 0.000150
1	TAP1	Sensitive to T cell-mediated killing	logFC: 2.55; FDR: 0.000150
1	TAP2	Sensitive to T cell-mediated killing	logFC: 2.51; FDR: 0.000150
1	DERL2	Sensitive to T cell-mediated killing	logFC: 2.39; FDR: 0.000150
1	NF1	Sensitive to T cell-mediated killing	logFC: 2.23; FDR: 0.000150
1	SYVN1	Sensitive to T cell-mediated killing	logFC: 2.15; FDR: 0.000150
1	MBNL1	Sensitive to T cell-mediated killing	logFC: 2.15; FDR: 0.000150
1	CIC	Sensitive to T cell-mediated killing	logFC: 1.94; FDR: 0.000150
1	TBL1X	Sensitive to T cell-mediated killing	logFC: 1.93; FDR: 0.000150
1	AUP1	Sensitive to T cell-mediated killing	logFC: 1.93; FDR: 0.000150
1	UBE2J1	Sensitive to T cell-mediated killing	logFC: 1.91; FDR: 0.000150
1	INTS10	Sensitive to T cell-mediated killing	logFC: 1.91; FDR: 0.000150
1	VGLL4	Sensitive to T cell-mediated killing	logFC: 1.65; FDR: 0.000150
1	SPRED1	Sensitive to T cell-mediated killing	logFC: 1.64; FDR: 0.001910
1	CBX4	Sensitive to T cell-mediated killing	logFC: 1.62; FDR: 0.000150
1	PMEL	Sensitive to T cell-mediated killing	logFC: 1.53; FDR: 0.000150
1	FBRS	Sensitive to T cell-mediated killing	logFC: 1.51; FDR: 0.000150
1	NLRC5	Sensitive to T cell-mediated killing	logFC: 1.48; FDR: 0.000150
1	SEL1L	Sensitive to T cell-mediated killing	logFC: 1.48; FDR: 0.000424
1	XPNPEP1	Sensitive to T cell-mediated killing	logFC: 1.47; FDR: 0.000150
1	MBNL2	Sensitive to T cell-mediated killing	logFC: 1.46; FDR: 0.001110
1	SWI5	Sensitive to T cell-mediated killing	logFC: 1.46; FDR: 0.000150
1	USP24	Sensitive to T cell-mediated killing	logFC: 1.45; FDR: 0.000651
1	IFNAR1	Sensitive to T cell-mediated killing	logFC: 1.42; FDR: 0.000150
1	CDKN1A	Sensitive to T cell-mediated killing	logFC: 1.38; FDR: 0.000150
1	IFNAR2	Sensitive to T cell-mediated killing	logFC: 1.37; FDR: 0.000424
1	RFXANK	Sensitive to T cell-mediated killing	logFC: 1.37; FDR: 0.008930
1	EDEM3	Sensitive to T cell-mediated killing	logFC: 1.35; FDR: 0.000150
1	NF2	Sensitive to T cell-mediated killing	logFC: 1.33; FDR: 0.001770
1	MED13	Sensitive to T cell-mediated killing	logFC: 1.29; FDR: 0.000150
1	USP22	Sensitive to T cell-mediated killing	logFC: 1.28; FDR: 0.031600
1	IPO13	Sensitive to T cell-mediated killing	logFC: 1.24; FDR: 0.029500
1	KDM1A	Sensitive to T cell-mediated killing	logFC: 1.20; FDR: 0.001910
1	BBX	Sensitive to T cell-mediated killing	logFC: 1.19; FDR: 0.000889
1	CHRAC1	Sensitive to T cell-mediated killing	logFC: 1.15; FDR: 0.047000
1	ELOA	Sensitive to T cell-mediated killing	logFC: 1.14; FDR: 0.023400
1	C1orf35	Sensitive to T cell-mediated killing	logFC: 1.08; FDR: 0.007980
1	CDKN2C	Sensitive to T cell-mediated killing	logFC: 1.08; FDR: 0.009650
1	KIRREL1	Sensitive to T cell-mediated killing	logFC: 1.07; FDR: 0.009650
1	LTA4H	Sensitive to T cell-mediated killing	logFC: 1.07; FDR: 0.001770
1	ALKBH8	Sensitive to T cell-mediated killing	logFC: 1.06; FDR: 0.009470
1	CDC73	Sensitive to T cell-mediated killing	logFC: 1.03; FDR: 0.034400
1	CDK12	Sensitive to T cell-mediated killing	logFC: 1.02; FDR: 0.007470
1	GOSR2	Sensitive to T cell-mediated killing	logFC: 1.02; FDR: 0.041900
1	RASA2	Sensitive to T cell-mediated killing	logFC: 1.01; FDR: 0.002970
1	SENP1	Sensitive to T cell-mediated killing	logFC: 0.99; FDR: 0.041900
1	FGF12	Sensitive to T cell-mediated killing	logFC: 0.98; FDR: 0.029500
1	CREB3L2	Sensitive to T cell-mediated killing	logFC: 0.98; FDR: 0.021200
1	MEN1	Sensitive to T cell-mediated killing	logFC: 0.96; FDR: 0.007980
1	SPOP	Sensitive to T cell-mediated killing	logFC: 0.96; FDR: 0.006500
1	CBLL1	Sensitive to T cell-mediated killing	logFC: 0.91; FDR: 0.041900
1	ANKRD24	Sensitive to T cell-mediated killing	logFC: 0.90; FDR: 0.007230
1	EDEM2	Sensitive to T cell-mediated killing	logFC: 0.90; FDR: 0.047000
1	PCIF1	Sensitive to T cell-mediated killing	logFC: 0.87; FDR: 0.008930
1	C7orf31	Sensitive to T cell-mediated killing	logFC: 0.86; FDR: 0.047300
1	DDX42	Sensitive to T cell-mediated killing	logFC: 0.85; FDR: 0.000651
1	DPPA5	Sensitive to T cell-mediated killing	logFC: 0.84; FDR: 0.005060
1	KIF3A	Sensitive to T cell-mediated killing	logFC: 0.77; FDR: 0.036300
1	SEC22A	Sensitive to T cell-mediated killing	logFC: 0.72; FDR: 0.041900
1	FURIN	Sensitive to T cell-mediated killing	logFC: 0.71; FDR: 0.048000
1	ANKRD6	Sensitive to T cell-mediated killing	logFC: 0.49; FDR: 0.024300
1	LSM12	Sensitive to T cell-mediated killing	logFC: 0.29; FDR: 0.021800
1	MARCKSL1	Sensitive to T cell-mediated killing	logFC: 0.20; FDR: 0.006430
1	ATG3	Resistant to T cell-mediated killing	logFC: -0.85; FDR: 0.04630
1	DBP	Resistant to T cell-mediated killing	logFC: -1.05; FDR: 0.04170
1	NLN	Resistant to T cell-mediated killing	logFC: -1.05; FDR: 0.04630
1	XYLB	Resistant to T cell-mediated killing	logFC: -1.09; FDR: 0.04630
1	PSTPIP2	Resistant to T cell-mediated killing	logFC: -1.22; FDR: 0.04630
1	OR5B3	Resistant to T cell-mediated killing	logFC: -1.33; FDR: 0.04630
1	PUS7L	Resistant to T cell-mediated killing	logFC: -1.37; FDR: 0.04170
1	BPNT1	Resistant to T cell-mediated killing	logFC: -1.45; FDR: 0.04180
1	TTLL5	Resistant to T cell-mediated killing	logFC: -1.47; FDR: 0.04630
1	CYB5R2	Resistant to T cell-mediated killing	logFC: -1.57; FDR: 0.04630
1	CRYGC	Resistant to T cell-mediated killing	logFC: -1.58; FDR: 0.04170
1	PHF12	Resistant to T cell-mediated killing	logFC: -1.70; FDR: 0.04630
1	PIK3CA	Resistant to T cell-mediated killing	logFC: -1.80; FDR: 0.04630
1	SEC23B	Resistant to T cell-mediated killing	logFC: -1.80; FDR: 0.04630
1	HAGH	Resistant to T cell-mediated killing	logFC: -1.83; FDR: 0.04630
1	OR2A14	Resistant to T cell-mediated killing	logFC: -1.83; FDR: 0.04630
1	ERAP1	Resistant to T cell-mediated killing	logFC: -1.85; FDR: 0.02000
1	SEPT3	Resistant to T cell-mediated killing	logFC: -1.86; FDR: 0.04630
1	ZFAND6	Resistant to T cell-mediated killing	logFC: -1.89; FDR: 0.04630
1	C3AR1	Resistant to T cell-mediated killing	logFC: -1.90; FDR: 0.04630
1	MYLIP	Resistant to T cell-mediated killing	logFC: -1.92; FDR: 0.03680
1	GOSR1	Resistant to T cell-mediated killing	logFC: -1.92; FDR: 0.03680
1	PCP4	Resistant to T cell-mediated killing	logFC: -1.93; FDR: 0.04630
1	CACHD1	Resistant to T cell-mediated killing	logFC: -1.95; FDR: 0.00979
1	RFXAP	Resistant to T cell-mediated killing	logFC: -1.96; FDR: 0.04170
1	SLC12A2	Resistant to T cell-mediated killing	logFC: -1.96; FDR: 0.04630
1	UBE2A	Resistant to T cell-mediated killing	logFC: -1.97; FDR: 0.04630
1	TGIF2LX	Resistant to T cell-mediated killing	logFC: -1.98; FDR: 0.04630
1	STRN4	Resistant to T cell-mediated killing	logFC: -1.98; FDR: 0.04630
1	NUDT11	Resistant to T cell-mediated killing	logFC: -1.99; FDR: 0.04630
1	TIAL1	Resistant to T cell-mediated killing	logFC: -2.01; FDR: 0.04180
1	TMEM41B	Resistant to T cell-mediated killing	logFC: -2.02; FDR: 0.04630
1	LRRN3	Resistant to T cell-mediated killing	logFC: -2.03; FDR: 0.04630
1	TUBB2B	Resistant to T cell-mediated killing	logFC: -2.04; FDR: 0.04630
1	GNE	Resistant to T cell-mediated killing	logFC: -2.06; FDR: 0.04630
1	KMT2C	Resistant to T cell-mediated killing	logFC: -2.08; FDR: 0.04630
1	STAT3	Resistant to T cell-mediated killing	logFC: -2.08; FDR: 0.04630
1	RGP1	Resistant to T cell-mediated killing	logFC: -2.09; FDR: 0.04630
1	PPP4R2	Resistant to T cell-mediated killing	logFC: -2.11; FDR: 0.04170
1	PRDX1	Resistant to T cell-mediated killing	logFC: -2.12; FDR: 0.04630
1	PIP5K1C	Resistant to T cell-mediated killing	logFC: -2.12; FDR: 0.04170
1	TMEM165	Resistant to T cell-mediated killing	logFC: -2.13; FDR: 0.04630
1	CARM1	Resistant to T cell-mediated killing	logFC: -2.13; FDR: 0.04630
1	VPS16	Resistant to T cell-mediated killing	logFC: -2.14; FDR: 0.04630
1	RSPH1	Resistant to T cell-mediated killing	logFC: -2.15; FDR: 0.04170
1	CD44	Resistant to T cell-mediated killing	logFC: -2.15; FDR: 0.04170
1	ARF6	Resistant to T cell-mediated killing	logFC: -2.16; FDR: 0.04170
1	IRGM	Resistant to T cell-mediated killing	logFC: -2.16; FDR: 0.04170
1	LAMTOR1	Resistant to T cell-mediated killing	logFC: -2.18; FDR: 0.04630
1	CD36	Resistant to T cell-mediated killing	logFC: -2.18; FDR: 0.04630
1	ZNF827	Resistant to T cell-mediated killing	logFC: -2.19; FDR: 0.04630
1	NANS	Resistant to T cell-mediated killing	logFC: -2.20; FDR: 0.04630
1	RNF38	Resistant to T cell-mediated killing	logFC: -2.20; FDR: 0.04170
1	EIF2AK3	Resistant to T cell-mediated killing	logFC: -2.20; FDR: 0.04630
1	IKBKG	Resistant to T cell-mediated killing	logFC: -2.21; FDR: 0.00979
1	SPEN	Resistant to T cell-mediated killing	logFC: -2.22; FDR: 0.04630
1	AK2	Resistant to T cell-mediated killing	logFC: -2.22; FDR: 0.04630
1	ICOSLG	Resistant to T cell-mediated killing	logFC: -2.24; FDR: 0.04630
1	LEMD2	Resistant to T cell-mediated killing	logFC: -2.25; FDR: 0.04630
1	GTF2I	Resistant to T cell-mediated killing	logFC: -2.25; FDR: 0.04170
1	XRCC2	Resistant to T cell-mediated killing	logFC: -2.26; FDR: 0.04180
1	BPTF	Resistant to T cell-mediated killing	logFC: -2.26; FDR: 0.03680
1	IMPG1	Resistant to T cell-mediated killing	logFC: -2.27; FDR: 0.04170
1	BIRC2	Resistant to T cell-mediated killing	logFC: -2.28; FDR: 0.02860
1	BATF2	Resistant to T cell-mediated killing	logFC: -2.30; FDR: 0.04170
1	LARP4	Resistant to T cell-mediated killing	logFC: -2.30; FDR: 0.04170
1	CWF19L1	Resistant to T cell-mediated killing	logFC: -2.30; FDR: 0.04630
1	PAK2	Resistant to T cell-mediated killing	logFC: -2.30; FDR: 0.04630
1	UBE2K	Resistant to T cell-mediated killing	logFC: -2.32; FDR: 0.04180
1	FAXC	Resistant to T cell-mediated killing	logFC: -2.33; FDR: 0.04170
1	ASXL2	Resistant to T cell-mediated killing	logFC: -2.33; FDR: 0.03680
1	MATR3	Resistant to T cell-mediated killing	logFC: -2.33; FDR: 0.04630
1	RAB7A	Resistant to T cell-mediated killing	logFC: -2.34; FDR: 0.04630
1	ARL14EPL	Resistant to T cell-mediated killing	logFC: -2.34; FDR: 0.04180
1	TM2D1	Resistant to T cell-mediated killing	logFC: -2.34; FDR: 0.04170
1	UBA6	Resistant to T cell-mediated killing	logFC: -2.35; FDR: 0.04630
1	FAM234B	Resistant to T cell-mediated killing	logFC: -2.35; FDR: 0.02000
1	RSF1	Resistant to T cell-mediated killing	logFC: -2.35; FDR: 0.04630
1	HES7	Resistant to T cell-mediated killing	logFC: -2.36; FDR: 0.04170
1	HSD17B4	Resistant to T cell-mediated killing	logFC: -2.36; FDR: 0.02860
1	GPX4	Resistant to T cell-mediated killing	logFC: -2.36; FDR: 0.04630
1	TXNDC15	Resistant to T cell-mediated killing	logFC: -2.37; FDR: 0.04630
1	CDK2	Resistant to T cell-mediated killing	logFC: -2.37; FDR: 0.04170
1	PIGU	Resistant to T cell-mediated killing	logFC: -2.37; FDR: 0.04170
1	RFX6	Resistant to T cell-mediated killing	logFC: -2.37; FDR: 0.04630
1	PADI4	Resistant to T cell-mediated killing	logFC: -2.38; FDR: 0.04180
1	UBE2R2	Resistant to T cell-mediated killing	logFC: -2.38; FDR: 0.04630
1	FHOD3	Resistant to T cell-mediated killing	logFC: -2.39; FDR: 0.03680
1	ICE1	Resistant to T cell-mediated killing	logFC: -2.39; FDR: 0.04630
1	XRCC4	Resistant to T cell-mediated killing	logFC: -2.39; FDR: 0.04170
1	FOXB1	Resistant to T cell-mediated killing	logFC: -2.39; FDR: 0.04630
1	STUB1	Resistant to T cell-mediated killing	logFC: -2.39; FDR: 0.04170
1	CCDC137	Resistant to T cell-mediated killing	logFC: -2.39; FDR: 0.04630
1	SNAPIN	Resistant to T cell-mediated killing	logFC: -2.40; FDR: 0.02000
1	TRIP13	Resistant to T cell-mediated killing	logFC: -2.40; FDR: 0.04630
1	NCKAP1	Resistant to T cell-mediated killing	logFC: -2.42; FDR: 0.03680
1	GML	Resistant to T cell-mediated killing	logFC: -2.42; FDR: 0.03680
1	UBE2J2	Resistant to T cell-mediated killing	logFC: -2.42; FDR: 0.04180
1	NSDHL	Resistant to T cell-mediated killing	logFC: -2.42; FDR: 0.04630
1	ARID4A	Resistant to T cell-mediated killing	logFC: -2.43; FDR: 0.00979
1	GALNT15	Resistant to T cell-mediated killing	logFC: -2.43; FDR: 0.04630
1	RAB13	Resistant to T cell-mediated killing	logFC: -2.44; FDR: 0.04630
1	GIGYF2	Resistant to T cell-mediated killing	logFC: -2.44; FDR: 0.04170
1	ERO1A	Resistant to T cell-mediated killing	logFC: -2.44; FDR: 0.04630
1	ZC3H18	Resistant to T cell-mediated killing	logFC: -2.45; FDR: 0.04630
1	NFIX	Resistant to T cell-mediated killing	logFC: -2.45; FDR: 0.00979
1	NEURL3	Resistant to T cell-mediated killing	logFC: -2.45; FDR: 0.04630
1	HSPA13	Resistant to T cell-mediated killing	logFC: -2.46; FDR: 0.04630
1	XRCC5	Resistant to T cell-mediated killing	logFC: -2.46; FDR: 0.03680
1	KEAP1	Resistant to T cell-mediated killing	logFC: -2.47; FDR: 0.02860
1	PAX3	Resistant to T cell-mediated killing	logFC: -2.47; FDR: 0.04180
1	ANKRD11	Resistant to T cell-mediated killing	logFC: -2.47; FDR: 0.04170
1	ATG16L1	Resistant to T cell-mediated killing	logFC: -2.48; FDR: 0.04630
1	OPRK1	Resistant to T cell-mediated killing	logFC: -2.48; FDR: 0.04630
1	SOX11	Resistant to T cell-mediated killing	logFC: -2.48; FDR: 0.04170
1	TTC33	Resistant to T cell-mediated killing	logFC: -2.48; FDR: 0.04170
1	TBC1D10B	Resistant to T cell-mediated killing	logFC: -2.48; FDR: 0.04170
1	ARHGAP11A	Resistant to T cell-mediated killing	logFC: -2.49; FDR: 0.04630
1	AR	Resistant to T cell-mediated killing	logFC: -2.49; FDR: 0.04170
1	ARHGAP21	Resistant to T cell-mediated killing	logFC: -2.50; FDR: 0.04170
1	CRLF3	Resistant to T cell-mediated killing	logFC: -2.52; FDR: 0.04630
1	ELMO2	Resistant to T cell-mediated killing	logFC: -2.52; FDR: 0.04180
1	TGIF2	Resistant to T cell-mediated killing	logFC: -2.53; FDR: 0.04630
1	SOD2	Resistant to T cell-mediated killing	logFC: -2.53; FDR: 0.04630
1	FAM170B	Resistant to T cell-mediated killing	logFC: -2.54; FDR: 0.02860
1	XRCC1	Resistant to T cell-mediated killing	logFC: -2.54; FDR: 0.04180
1	MEIOC	Resistant to T cell-mediated killing	logFC: -2.54; FDR: 0.04180
1	2023-03-05	Resistant to T cell-mediated killing	logFC: -2.55; FDR: 0.00700
1	PITX2	Resistant to T cell-mediated killing	logFC: -2.56; FDR: 0.04180
1	RAB25	Resistant to T cell-mediated killing	logFC: -2.56; FDR: 0.04630
1	CCDC155	Resistant to T cell-mediated killing	logFC: -2.56; FDR: 0.02000
1	ZNF473	Resistant to T cell-mediated killing	logFC: -2.56; FDR: 0.04630
1	TBK1	Resistant to T cell-mediated killing	logFC: -2.58; FDR: 0.04630
1	ZNF148	Resistant to T cell-mediated killing	logFC: -2.58; FDR: 0.04630
1	RGMB	Resistant to T cell-mediated killing	logFC: -2.58; FDR: 0.04630
1	TM2D3	Resistant to T cell-mediated killing	logFC: -2.59; FDR: 0.02000
1	TSC2	Resistant to T cell-mediated killing	logFC: -2.59; FDR: 0.04630
1	KIAA0586	Resistant to T cell-mediated killing	logFC: -2.59; FDR: 0.04630
1	CDK5	Resistant to T cell-mediated killing	logFC: -2.60; FDR: 0.04630
1	CMIP	Resistant to T cell-mediated killing	logFC: -2.60; FDR: 0.04630
1	CCDC187	Resistant to T cell-mediated killing	logFC: -2.60; FDR: 0.04170
1	CNOT8	Resistant to T cell-mediated killing	logFC: -2.60; FDR: 0.04180
1	YWHAZ	Resistant to T cell-mediated killing	logFC: -2.60; FDR: 0.02000
1	ZNF281	Resistant to T cell-mediated killing	logFC: -2.61; FDR: 0.02000
1	BECN1	Resistant to T cell-mediated killing	logFC: -2.61; FDR: 0.04170
1	SLC2A1	Resistant to T cell-mediated killing	logFC: -2.61; FDR: 0.02000
1	ILK	Resistant to T cell-mediated killing	logFC: -2.62; FDR: 0.04630
1	GPR31	Resistant to T cell-mediated killing	logFC: -2.62; FDR: 0.01020
1	BOLL	Resistant to T cell-mediated killing	logFC: -2.63; FDR: 0.01020
1	TACC3	Resistant to T cell-mediated killing	logFC: -2.63; FDR: 0.04170
1	PAOX	Resistant to T cell-mediated killing	logFC: -2.66; FDR: 0.04630
1	GABRB3	Resistant to T cell-mediated killing	logFC: -2.66; FDR: 0.04170
1	TREX1	Resistant to T cell-mediated killing	logFC: -2.67; FDR: 0.04630
1	DNAJA2	Resistant to T cell-mediated killing	logFC: -2.67; FDR: 0.04630
1	VPS4B	Resistant to T cell-mediated killing	logFC: -2.68; FDR: 0.04630
1	NPRL3	Resistant to T cell-mediated killing	logFC: -2.68; FDR: 0.04630
1	MTCH1	Resistant to T cell-mediated killing	logFC: -2.68; FDR: 0.02000
1	IQSEC1	Resistant to T cell-mediated killing	logFC: -2.68; FDR: 0.00700
1	LRP10	Resistant to T cell-mediated killing	logFC: -2.68; FDR: 0.02000
1	RAF1	Resistant to T cell-mediated killing	logFC: -2.69; FDR: 0.03680
1	DTX3L	Resistant to T cell-mediated killing	logFC: -2.69; FDR: 0.02860
1	CCS	Resistant to T cell-mediated killing	logFC: -2.70; FDR: 0.03680
1	EPC1	Resistant to T cell-mediated killing	logFC: -2.70; FDR: 0.04170
1	STRADA	Resistant to T cell-mediated killing	logFC: -2.70; FDR: 0.03680
1	NRBF2	Resistant to T cell-mediated killing	logFC: -2.70; FDR: 0.04630
1	TEN1	Resistant to T cell-mediated killing	logFC: -2.72; FDR: 0.02000
1	IRF1	Resistant to T cell-mediated killing	logFC: -2.72; FDR: 0.02000
1	TK2	Resistant to T cell-mediated killing	logFC: -2.73; FDR: 0.04630
1	DDI2	Resistant to T cell-mediated killing	logFC: -2.73; FDR: 0.00944
1	ARID1A	Resistant to T cell-mediated killing	logFC: -2.74; FDR: 0.02000
1	ZNF676	Resistant to T cell-mediated killing	logFC: -2.75; FDR: 0.03680
1	ACTR3	Resistant to T cell-mediated killing	logFC: -2.75; FDR: 0.00979
1	EIF2AK4	Resistant to T cell-mediated killing	logFC: -2.75; FDR: 0.01020
1	PDE7A	Resistant to T cell-mediated killing	logFC: -2.76; FDR: 0.03680
1	DPF2	Resistant to T cell-mediated killing	logFC: -2.76; FDR: 0.03680
1	RRAGA	Resistant to T cell-mediated killing	logFC: -2.76; FDR: 0.02860
1	RNF31	Resistant to T cell-mediated killing	logFC: -2.77; FDR: 0.03680
1	PRKCQ	Resistant to T cell-mediated killing	logFC: -2.79; FDR: 0.03680
1	EPG5	Resistant to T cell-mediated killing	logFC: -2.79; FDR: 0.02000
1	GSS	Resistant to T cell-mediated killing	logFC: -2.79; FDR: 0.04170
1	CNOT11	Resistant to T cell-mediated killing	logFC: -2.80; FDR: 0.03680
1	HIPK2	Resistant to T cell-mediated killing	logFC: -2.80; FDR: 0.01020
1	MAN2A1	Resistant to T cell-mediated killing	logFC: -2.80; FDR: 0.00979
1	CHMP5	Resistant to T cell-mediated killing	logFC: -2.82; FDR: 0.00700
1	PCGF6	Resistant to T cell-mediated killing	logFC: -2.86; FDR: 0.00700
1	NAMPT	Resistant to T cell-mediated killing	logFC: -2.87; FDR: 0.04170
1	ERI1	Resistant to T cell-mediated killing	logFC: -2.88; FDR: 0.04170
1	PBRM1	Resistant to T cell-mediated killing	logFC: -2.89; FDR: 0.00700
1	ATG5	Resistant to T cell-mediated killing	logFC: -2.89; FDR: 0.04630
1	UBE2H	Resistant to T cell-mediated killing	logFC: -2.90; FDR: 0.00700
1	GABPB1	Resistant to T cell-mediated killing	logFC: -2.91; FDR: 0.02000
1	GPI	Resistant to T cell-mediated killing	logFC: -2.91; FDR: 0.00942
1	USP19	Resistant to T cell-mediated killing	logFC: -2.92; FDR: 0.03680
1	BRD7	Resistant to T cell-mediated killing	logFC: -2.94; FDR: 0.03680
1	JMJD6	Resistant to T cell-mediated killing	logFC: -2.95; FDR: 0.00942
1	TGIF1	Resistant to T cell-mediated killing	logFC: -2.97; FDR: 0.02000
1	FIS1	Resistant to T cell-mediated killing	logFC: -2.98; FDR: 0.03680
1	CFLAR	Resistant to T cell-mediated killing	logFC: -2.98; FDR: 0.02000
1	PTPN11	Resistant to T cell-mediated killing	logFC: -2.99; FDR: 0.00700
1	MAEA	Resistant to T cell-mediated killing	logFC: -3.00; FDR: 0.02000
1	HDAC5	Resistant to T cell-mediated killing	logFC: -3.00; FDR: 0.00979
1	MPRIP	Resistant to T cell-mediated killing	logFC: -3.01; FDR: 0.00700
1	ITGAV	Resistant to T cell-mediated killing	logFC: -3.02; FDR: 0.02000
1	CRKL	Resistant to T cell-mediated killing	logFC: -3.06; FDR: 0.01020
1	ARID2	Resistant to T cell-mediated killing	logFC: -3.06; FDR: 0.00979
1	MEMO1	Resistant to T cell-mediated killing	logFC: -3.07; FDR: 0.02000
1	SERPINB9	Resistant to T cell-mediated killing	logFC: -3.08; FDR: 0.00979
1	KRIT1	Resistant to T cell-mediated killing	logFC: -3.08; FDR: 0.00700
1	SRRD	Resistant to T cell-mediated killing	logFC: -3.13; FDR: 0.00700
1	SOX4	Resistant to T cell-mediated killing	logFC: -3.17; FDR: 0.00979
1	WDR26	Resistant to T cell-mediated killing	logFC: -3.17; FDR: 0.01020
1	TIPARP	Resistant to T cell-mediated killing	logFC: -3.18; FDR: 0.00700
1	NADK	Resistant to T cell-mediated killing	logFC: -3.18; FDR: 0.00354
1	TK1	Resistant to T cell-mediated killing	logFC: -3.18; FDR: 0.00700
1	TCOF1	Resistant to T cell-mediated killing	logFC: -3.20; FDR: 0.00700
1	NPRL2	Resistant to T cell-mediated killing	logFC: -3.20; FDR: 0.00700
1	PTPN2	Resistant to T cell-mediated killing	logFC: -3.22; FDR: 0.00700
1	GALE	Resistant to T cell-mediated killing	logFC: -3.22; FDR: 0.02000
1	SPNS1	Resistant to T cell-mediated killing	logFC: -3.24; FDR: 0.01020
1	USP18	Resistant to T cell-mediated killing	logFC: -3.28; FDR: 0.00433
1	PSME2	Resistant to T cell-mediated killing	logFC: -3.29; FDR: 0.00700
1	TCEA1	Resistant to T cell-mediated killing	logFC: -3.31; FDR: 0.00354
1	FITM2	Resistant to T cell-mediated killing	logFC: -3.33; FDR: 0.00700
1	YPEL5	Resistant to T cell-mediated killing	logFC: -3.36; FDR: 0.00700
1	CREB1	Resistant to T cell-mediated killing	logFC: -3.40; FDR: 0.00700
1	RELA	Resistant to T cell-mediated killing	logFC: -3.45; FDR: 0.00124
1	FADD	Resistant to T cell-mediated killing	logFC: -3.45; FDR: 0.00700
1	PSME1	Resistant to T cell-mediated killing	logFC: -3.53; FDR: 0.00700
1	IKBKB	Resistant to T cell-mediated killing	logFC: -3.57; FDR: 0.00354
1	CD274	Resistant to T cell-mediated killing	logFC: -3.70; FDR: 0.00124
1	OTULIN	Resistant to T cell-mediated killing	logFC: -3.73; FDR: 0.00124
1	PSMB8	Resistant to T cell-mediated killing	logFC: -3.93; FDR: 0.00124
2	B2M	Sensitive to T cell-mediated killing	logFC: 5.36; FDR: 0.000381
2	IFNGR2	Sensitive to T cell-mediated killing	logFC: 3.53; FDR: 0.000381
2	IFNGR1	Sensitive to T cell-mediated killing	logFC: 3.44; FDR: 0.000381
2	JAK2	Sensitive to T cell-mediated killing	logFC: 3.10; FDR: 0.000381
2	SETD2	Sensitive to T cell-mediated killing	logFC: 2.72; FDR: 0.000381
2	JAK1	Sensitive to T cell-mediated killing	logFC: 2.50; FDR: 0.000381
2	STAT1	Sensitive to T cell-mediated killing	logFC: 2.44; FDR: 0.000381
2	KMT2B	Sensitive to T cell-mediated killing	logFC: 1.82; FDR: 0.000381
2	ALAD	Sensitive to T cell-mediated killing	logFC: 1.38; FDR: 0.000381
2	WDR48	Sensitive to T cell-mediated killing	logFC: 1.37; FDR: 0.000381
2	WDR20	Sensitive to T cell-mediated killing	logFC: 1.34; FDR: 0.000381
2	NF1	Sensitive to T cell-mediated killing	logFC: 1.27; FDR: 0.000381
2	CS	Sensitive to T cell-mediated killing	logFC: 1.20; FDR: 0.001060
2	UBR5	Sensitive to T cell-mediated killing	logFC: 1.15; FDR: 0.046600
2	KCTD5	Sensitive to T cell-mediated killing	logFC: 1.07; FDR: 0.000381
2	HNRNPH1	Sensitive to T cell-mediated killing	logFC: 1.06; FDR: 0.014300
2	WDR24	Sensitive to T cell-mediated killing	logFC: 1.04; FDR: 0.004950
2	LRRC8A	Sensitive to T cell-mediated killing	logFC: 0.91; FDR: 0.032300
2	NAA30	Sensitive to T cell-mediated killing	logFC: 0.89; FDR: 0.016800
2	SULT6B1	Sensitive to T cell-mediated killing	logFC: 0.86; FDR: 0.011400
2	CEP57L1	Sensitive to T cell-mediated killing	logFC: 0.84; FDR: 0.026800
2	PSTPIP2	Resistant to T cell-mediated killing	logFC: -1.53; FDR: 0.04220
2	LRRTM4	Resistant to T cell-mediated killing	logFC: -1.55; FDR: 0.04220
2	NMT2	Resistant to T cell-mediated killing	logFC: -1.58; FDR: 0.04220
2	LAMTOR4	Resistant to T cell-mediated killing	logFC: -1.59; FDR: 0.02150
2	TERT	Resistant to T cell-mediated killing	logFC: -1.61; FDR: 0.04220
2	RCE1	Resistant to T cell-mediated killing	logFC: -1.63; FDR: 0.04190
2	SOCS1	Resistant to T cell-mediated killing	logFC: -1.64; FDR: 0.02150
2	ROPN1	Resistant to T cell-mediated killing	logFC: -1.64; FDR: 0.04220
2	ALK	Resistant to T cell-mediated killing	logFC: -1.64; FDR: 0.02150
2	CTPS1	Resistant to T cell-mediated killing	logFC: -1.69; FDR: 0.04110
2	MOGS	Resistant to T cell-mediated killing	logFC: -1.71; FDR: 0.04110
2	RARS2	Resistant to T cell-mediated killing	logFC: -1.72; FDR: 0.04110
2	GPX1	Resistant to T cell-mediated killing	logFC: -1.74; FDR: 0.04220
2	RWDD1	Resistant to T cell-mediated killing	logFC: -1.76; FDR: 0.04220
2	MED23	Resistant to T cell-mediated killing	logFC: -1.77; FDR: 0.04220
2	B3GLCT	Resistant to T cell-mediated killing	logFC: -1.82; FDR: 0.01650
2	HSD17B10	Resistant to T cell-mediated killing	logFC: -1.83; FDR: 0.04110
2	KCTD2	Resistant to T cell-mediated killing	logFC: -1.85; FDR: 0.03410
2	SLC33A1	Resistant to T cell-mediated killing	logFC: -1.86; FDR: 0.02370
2	PAK2	Resistant to T cell-mediated killing	logFC: -1.86; FDR: 0.04220
2	ATF4	Resistant to T cell-mediated killing	logFC: -1.87; FDR: 0.02150
2	SCYL1	Resistant to T cell-mediated killing	logFC: -1.88; FDR: 0.04220
2	GRAMD1B	Resistant to T cell-mediated killing	logFC: -1.90; FDR: 0.04220
2	RND2	Resistant to T cell-mediated killing	logFC: -1.91; FDR: 0.04220
2	OR6Y1	Resistant to T cell-mediated killing	logFC: -1.91; FDR: 0.04220
2	OSGEPL1	Resistant to T cell-mediated killing	logFC: -1.91; FDR: 0.04110
2	RBBP4	Resistant to T cell-mediated killing	logFC: -1.92; FDR: 0.04110
2	ALG3	Resistant to T cell-mediated killing	logFC: -1.94; FDR: 0.04220
2	RBCK1	Resistant to T cell-mediated killing	logFC: -1.96; FDR: 0.01650
2	YLPM1	Resistant to T cell-mediated killing	logFC: -1.97; FDR: 0.04220
2	SSU72	Resistant to T cell-mediated killing	logFC: -1.98; FDR: 0.04220
2	CYLD	Resistant to T cell-mediated killing	logFC: -1.98; FDR: 0.04110
2	MC1R	Resistant to T cell-mediated killing	logFC: -1.99; FDR: 0.02150
2	CCS	Resistant to T cell-mediated killing	logFC: -1.99; FDR: 0.04220
2	HSD17B12	Resistant to T cell-mediated killing	logFC: -2.00; FDR: 0.04220
2	ANKRD46	Resistant to T cell-mediated killing	logFC: -2.02; FDR: 0.04110
2	IKBKG	Resistant to T cell-mediated killing	logFC: -2.03; FDR: 0.04220
2	DDX20	Resistant to T cell-mediated killing	logFC: -2.03; FDR: 0.04220
2	AKT1	Resistant to T cell-mediated killing	logFC: -2.04; FDR: 0.04110
2	EXOC7	Resistant to T cell-mediated killing	logFC: -2.05; FDR: 0.02150
2	LARP4	Resistant to T cell-mediated killing	logFC: -2.06; FDR: 0.04110
2	UBTD1	Resistant to T cell-mediated killing	logFC: -2.07; FDR: 0.03410
2	BRWD3	Resistant to T cell-mediated killing	logFC: -2.09; FDR: 0.04220
2	NUDCD2	Resistant to T cell-mediated killing	logFC: -2.09; FDR: 0.02150
2	PPCS	Resistant to T cell-mediated killing	logFC: -2.09; FDR: 0.03410
2	MRPS21	Resistant to T cell-mediated killing	logFC: -2.09; FDR: 0.04110
2	GNB2	Resistant to T cell-mediated killing	logFC: -2.09; FDR: 0.02150
2	CHIC2	Resistant to T cell-mediated killing	logFC: -2.09; FDR: 0.01650
2	FNBP4	Resistant to T cell-mediated killing	logFC: -2.09; FDR: 0.04110
2	PLPP2	Resistant to T cell-mediated killing	logFC: -2.10; FDR: 0.04220
2	TRIP11	Resistant to T cell-mediated killing	logFC: -2.11; FDR: 0.04220
2	CCNA2	Resistant to T cell-mediated killing	logFC: -2.12; FDR: 0.03500
2	BRINP2	Resistant to T cell-mediated killing	logFC: -2.12; FDR: 0.04220
2	HNRNPF	Resistant to T cell-mediated killing	logFC: -2.12; FDR: 0.01650
2	CCDC134	Resistant to T cell-mediated killing	logFC: -2.12; FDR: 0.01650
2	PRDM10	Resistant to T cell-mediated killing	logFC: -2.14; FDR: 0.01650
2	SMARCE1	Resistant to T cell-mediated killing	logFC: -2.15; FDR: 0.02150
2	TMED2	Resistant to T cell-mediated killing	logFC: -2.15; FDR: 0.04220
2	USP24	Resistant to T cell-mediated killing	logFC: -2.15; FDR: 0.04220
2	IPO11	Resistant to T cell-mediated killing	logFC: -2.17; FDR: 0.04220
2	ARF6	Resistant to T cell-mediated killing	logFC: -2.18; FDR: 0.04220
2	PRRC2A	Resistant to T cell-mediated killing	logFC: -2.19; FDR: 0.04110
2	RHBDL2	Resistant to T cell-mediated killing	logFC: -2.19; FDR: 0.04110
2	LMAN2	Resistant to T cell-mediated killing	logFC: -2.20; FDR: 0.04990
2	PARN	Resistant to T cell-mediated killing	logFC: -2.22; FDR: 0.02370
2	TVP23B	Resistant to T cell-mediated killing	logFC: -2.24; FDR: 0.04110
2	MED7	Resistant to T cell-mediated killing	logFC: -2.25; FDR: 0.02150
2	PRKCQ	Resistant to T cell-mediated killing	logFC: -2.26; FDR: 0.02150
2	GNE	Resistant to T cell-mediated killing	logFC: -2.27; FDR: 0.02150
2	AIP	Resistant to T cell-mediated killing	logFC: -2.27; FDR: 0.02150
2	CROCC	Resistant to T cell-mediated killing	logFC: -2.27; FDR: 0.02150
2	UGGT1	Resistant to T cell-mediated killing	logFC: -2.31; FDR: 0.04220
2	ATR	Resistant to T cell-mediated killing	logFC: -2.32; FDR: 0.02150
2	CCNC	Resistant to T cell-mediated killing	logFC: -2.33; FDR: 0.04110
2	RER1	Resistant to T cell-mediated killing	logFC: -2.34; FDR: 0.02150
2	CKS1B	Resistant to T cell-mediated killing	logFC: -2.34; FDR: 0.00722
2	PTAR1	Resistant to T cell-mediated killing	logFC: -2.35; FDR: 0.01650
2	DLST	Resistant to T cell-mediated killing	logFC: -2.35; FDR: 0.01650
2	UBR4	Resistant to T cell-mediated killing	logFC: -2.35; FDR: 0.01650
2	DDX42	Resistant to T cell-mediated killing	logFC: -2.35; FDR: 0.00722
2	CXorf56	Resistant to T cell-mediated killing	logFC: -2.35; FDR: 0.04220
2	VPS29	Resistant to T cell-mediated killing	logFC: -2.37; FDR: 0.02150
2	ATG13	Resistant to T cell-mediated killing	logFC: -2.37; FDR: 0.04220
2	RAB1A	Resistant to T cell-mediated killing	logFC: -2.39; FDR: 0.03500
2	RAD51D	Resistant to T cell-mediated killing	logFC: -2.39; FDR: 0.01670
2	OTULIN	Resistant to T cell-mediated killing	logFC: -2.39; FDR: 0.04110
2	GPAA1	Resistant to T cell-mediated killing	logFC: -2.40; FDR: 0.02150
2	PIH1D1	Resistant to T cell-mediated killing	logFC: -2.41; FDR: 0.02150
2	NRBF2	Resistant to T cell-mediated killing	logFC: -2.41; FDR: 0.02150
2	NEPRO	Resistant to T cell-mediated killing	logFC: -2.43; FDR: 0.04110
2	RBM34	Resistant to T cell-mediated killing	logFC: -2.44; FDR: 0.00722
2	IREB2	Resistant to T cell-mediated killing	logFC: -2.44; FDR: 0.04110
2	UGP2	Resistant to T cell-mediated killing	logFC: -2.45; FDR: 0.04150
2	ARF3	Resistant to T cell-mediated killing	logFC: -2.46; FDR: 0.04110
2	ITGAV	Resistant to T cell-mediated killing	logFC: -2.47; FDR: 0.01650
2	UBE2N	Resistant to T cell-mediated killing	logFC: -2.47; FDR: 0.01650
2	MCL1	Resistant to T cell-mediated killing	logFC: -2.48; FDR: 0.03410
2	VPS11	Resistant to T cell-mediated killing	logFC: -2.49; FDR: 0.04110
2	BIRC2	Resistant to T cell-mediated killing	logFC: -2.49; FDR: 0.01650
2	RELA	Resistant to T cell-mediated killing	logFC: -2.51; FDR: 0.04110
2	N4BP1	Resistant to T cell-mediated killing	logFC: -2.54; FDR: 0.01650
2	SLC35A1	Resistant to T cell-mediated killing	logFC: -2.55; FDR: 0.00722
2	TMED10	Resistant to T cell-mediated killing	logFC: -2.58; FDR: 0.02150
2	TLCD1	Resistant to T cell-mediated killing	logFC: -2.58; FDR: 0.02150
2	SPTLC2	Resistant to T cell-mediated killing	logFC: -2.62; FDR: 0.00722
2	SEPSECS	Resistant to T cell-mediated killing	logFC: -2.62; FDR: 0.01670
2	PIGK	Resistant to T cell-mediated killing	logFC: -2.62; FDR: 0.00722
2	SPTLC1	Resistant to T cell-mediated killing	logFC: -2.64; FDR: 0.01650
2	ASNSD1	Resistant to T cell-mediated killing	logFC: -2.65; FDR: 0.01650
2	GPX4	Resistant to T cell-mediated killing	logFC: -2.65; FDR: 0.02150
2	UBA6	Resistant to T cell-mediated killing	logFC: -2.66; FDR: 0.02150
2	VPS33A	Resistant to T cell-mediated killing	logFC: -2.67; FDR: 0.00722
2	TMX2	Resistant to T cell-mediated killing	logFC: -2.67; FDR: 0.00722
2	CWC27	Resistant to T cell-mediated killing	logFC: -2.68; FDR: 0.00545
2	CHTF8	Resistant to T cell-mediated killing	logFC: -2.69; FDR: 0.02150
2	KMT2D	Resistant to T cell-mediated killing	logFC: -2.69; FDR: 0.01650
2	ATG5	Resistant to T cell-mediated killing	logFC: -2.69; FDR: 0.01650
2	DSCC1	Resistant to T cell-mediated killing	logFC: -2.70; FDR: 0.00545
2	ATP6V1H	Resistant to T cell-mediated killing	logFC: -2.71; FDR: 0.00722
2	SLC7A11	Resistant to T cell-mediated killing	logFC: -2.73; FDR: 0.01650
2	GSS	Resistant to T cell-mediated killing	logFC: -2.74; FDR: 0.04110
2	PIGU	Resistant to T cell-mediated killing	logFC: -2.78; FDR: 0.00545
2	STUB1	Resistant to T cell-mediated killing	logFC: -2.79; FDR: 0.00495
2	CALR	Resistant to T cell-mediated killing	logFC: -2.82; FDR: 0.01650
2	APRT	Resistant to T cell-mediated killing	logFC: -2.83; FDR: 0.01650
2	ALG8	Resistant to T cell-mediated killing	logFC: -2.84; FDR: 0.00545
2	EI24	Resistant to T cell-mediated killing	logFC: -2.85; FDR: 0.01670
2	MTCH1	Resistant to T cell-mediated killing	logFC: -2.87; FDR: 0.00722
2	EEFSEC	Resistant to T cell-mediated killing	logFC: -2.91; FDR: 0.00248
2	TRAF3	Resistant to T cell-mediated killing	logFC: -2.94; FDR: 0.00722
2	USP18	Resistant to T cell-mediated killing	logFC: -2.95; FDR: 0.01650
2	VPS4B	Resistant to T cell-mediated killing	logFC: -2.97; FDR: 0.01650
2	TRAF2	Resistant to T cell-mediated killing	logFC: -2.98; FDR: 0.00722
2	PIGS	Resistant to T cell-mediated killing	logFC: -3.01; FDR: 0.01650
2	FITM2	Resistant to T cell-mediated killing	logFC: -3.03; FDR: 0.00545
2	MEGF8	Resistant to T cell-mediated killing	logFC: -3.14; FDR: 0.00545
2	ERI1	Resistant to T cell-mediated killing	logFC: -3.18; FDR: 0.00722
2	RNF31	Resistant to T cell-mediated killing	logFC: -3.40; FDR: 0.00545
2	PTPN2	Resistant to T cell-mediated killing	logFC: -3.63; FDR: 0.00248
3	HLA-A	Sensitive to T cell-mediated killing	Second most enriched score: 2.2
3	B2M	Sensitive to T cell-mediated killing	Second most enriched score: 2.11
3	MLANA	Sensitive to T cell-mediated killing	Second most enriched score: 1.73
3	SOX10	Sensitive to T cell-mediated killing	Second most enriched score: 1.67
3	CD58	Sensitive to T cell-mediated killing	Second most enriched score: 1.42
3	TAPBP	Sensitive to T cell-mediated killing	Second most enriched score: 1.33
3	TAP2	Sensitive to T cell-mediated killing	Second most enriched score: 1.31
3	TAF3	Sensitive to T cell-mediated killing	Second most enriched score: 1.22
3	SRP54	Sensitive to T cell-mediated killing	Second most enriched score: 1.21
3	MAD2L1	Sensitive to T cell-mediated killing	Second most enriched score: 1.18
3	RNPS1	Sensitive to T cell-mediated killing	Second most enriched score: 1.12
3	PSMB5	Sensitive to T cell-mediated killing	Second most enriched score: 1.12
3	RPL10A	Sensitive to T cell-mediated killing	Second most enriched score: 1.09
3	CRKL	Sensitive to T cell-mediated killing	Second most enriched score: 1.08
3	APLNR	Sensitive to T cell-mediated killing	Second most enriched score: 1.06
3	TAP1	Sensitive to T cell-mediated killing	Second most enriched score: 1.05
3	COL17A1	Sensitive to T cell-mediated killing	Second most enriched score: 1.04
3	RPL23	Sensitive to T cell-mediated killing	Second most enriched score: 1.03
3	PLD3	Sensitive to T cell-mediated killing	Second most enriched score: 0.98
3	RIPK1	Sensitive to T cell-mediated killing	Second most enriched score: 0.98
3	SUPT6H	Sensitive to T cell-mediated killing	Second most enriched score: 0.97
3	RPL38	Sensitive to T cell-mediated killing	Second most enriched score: 0.97
3	EEF2	Sensitive to T cell-mediated killing	Second most enriched score: 0.97
3	KIF11	Sensitive to T cell-mediated killing	Second most enriched score: 0.97
3	EQTN	Sensitive to T cell-mediated killing	Second most enriched score: 0.95
3	RPL24	Sensitive to T cell-mediated killing	Second most enriched score: 0.94
3	MIPOL1	Sensitive to T cell-mediated killing	Second most enriched score: 0.93
3	SEC61A1	Sensitive to T cell-mediated killing	Second most enriched score: 0.93
3	TM4SF1	Sensitive to T cell-mediated killing	Second most enriched score: 0.92
3	RBM18	Sensitive to T cell-mediated killing	Second most enriched score: 0.9
3	NIPBL	Sensitive to T cell-mediated killing	Second most enriched score: 0.9
3	TAF5	Sensitive to T cell-mediated killing	Second most enriched score: 0.89
3	EPS15L1	Sensitive to T cell-mediated killing	Second most enriched score: 0.89
3	KCNMA1	Sensitive to T cell-mediated killing	Second most enriched score: 0.88
3	GABPA	Sensitive to T cell-mediated killing	Second most enriched score: 0.87
3	AURKA	Sensitive to T cell-mediated killing	Second most enriched score: 0.86
3	KHDRBS1	Sensitive to T cell-mediated killing	Second most enriched score: 0.85
3	FAM86B1	Sensitive to T cell-mediated killing	Second most enriched score: 0.85
3	VHL	Sensitive to T cell-mediated killing	Second most enriched score: 0.85
3	PRPF40A	Sensitive to T cell-mediated killing	Second most enriched score: 0.83
3	DNTTIP2	Sensitive to T cell-mediated killing	Second most enriched score: 0.83
3	ASH2L	Sensitive to T cell-mediated killing	Second most enriched score: 0.83
3	RTF1	Sensitive to T cell-mediated killing	Second most enriched score: 0.82
3	ACTG1	Sensitive to T cell-mediated killing	Second most enriched score: 0.82
3	CASP8	Sensitive to T cell-mediated killing	Second most enriched score: 0.82
3	SRPR	Sensitive to T cell-mediated killing	Second most enriched score: 0.82
3	FCHO2	Sensitive to T cell-mediated killing	Second most enriched score: 0.81
3	SLC25A51	Sensitive to T cell-mediated killing	Second most enriched score: 0.81
3	CCDC42B	Sensitive to T cell-mediated killing	Second most enriched score: 0.81
3	SLC1A7	Sensitive to T cell-mediated killing	Second most enriched score: 0.81
3	PSMA6	Sensitive to T cell-mediated killing	Second most enriched score: 0.81
3	FADD	Sensitive to T cell-mediated killing	Second most enriched score: 0.81
3	ZNF716	Sensitive to T cell-mediated killing	Second most enriched score: 0.8
3	CMTM6	Sensitive to T cell-mediated killing	Second most enriched score: 0.8
3	BANK1	Sensitive to T cell-mediated killing	Second most enriched score: 0.79
3	FSHB	Sensitive to T cell-mediated killing	Second most enriched score: 0.79
3	SCMH1	Sensitive to T cell-mediated killing	Second most enriched score: 0.79
3	NUDT5	Sensitive to T cell-mediated killing	Second most enriched score: 0.78
3	STAT1	Sensitive to T cell-mediated killing	Second most enriched score: 0.78
3	RPL23A	Sensitive to T cell-mediated killing	Second most enriched score: 0.78
3	COL23A1	Sensitive to T cell-mediated killing	Second most enriched score: 0.78
3	RPL18A	Sensitive to T cell-mediated killing	Second most enriched score: 0.77
3	ACY1	Sensitive to T cell-mediated killing	Second most enriched score: 0.77
3	POU2F1	Sensitive to T cell-mediated killing	Second most enriched score: 0.77
3	C22orf43	Sensitive to T cell-mediated killing	Second most enriched score: 0.77
3	FAM47C	Sensitive to T cell-mediated killing	Second most enriched score: 0.76
3	ABCC9	Sensitive to T cell-mediated killing	Second most enriched score: 0.75
3	NHLRC3	Sensitive to T cell-mediated killing	Second most enriched score: 0.75
3	ANKLE2	Sensitive to T cell-mediated killing	Second most enriched score: 0.75
3	KCNRG	Sensitive to T cell-mediated killing	Second most enriched score: 0.75
3	CRTC3	Sensitive to T cell-mediated killing	Second most enriched score: 0.75
3	RPL18	Sensitive to T cell-mediated killing	Second most enriched score: 0.75
3	PMAIP1	Sensitive to T cell-mediated killing	Second most enriched score: 0.74
3	NIP7	Sensitive to T cell-mediated killing	Second most enriched score: 0.74
3	RPL9	Sensitive to T cell-mediated killing	Second most enriched score: 0.74
3	CLPSL2	Sensitive to T cell-mediated killing	Second most enriched score: 0.74
3	STK38	Sensitive to T cell-mediated killing	Second most enriched score: 0.73
3	AHSP	Sensitive to T cell-mediated killing	Second most enriched score: 0.73
3	MED19	Sensitive to T cell-mediated killing	Second most enriched score: 0.73
3	GPX8	Sensitive to T cell-mediated killing	Second most enriched score: 0.73
3	TCEAL7	Sensitive to T cell-mediated killing	Second most enriched score: 0.73
3	ELP5	Sensitive to T cell-mediated killing	Second most enriched score: 0.73
3	PSMB3	Sensitive to T cell-mediated killing	Second most enriched score: 0.73
3	RPS10	Sensitive to T cell-mediated killing	Second most enriched score: 0.73
3	CLECL1	Sensitive to T cell-mediated killing	Second most enriched score: 0.72
3	MBTPS2	Sensitive to T cell-mediated killing	Second most enriched score: 0.72
3	ARIH1	Sensitive to T cell-mediated killing	Second most enriched score: 0.72
3	PPIP5K2	Sensitive to T cell-mediated killing	Second most enriched score: 0.72
3	MED22	Sensitive to T cell-mediated killing	Second most enriched score: 0.72
3	JAK1	Sensitive to T cell-mediated killing	Second most enriched score: 0.71
3	MAU2	Sensitive to T cell-mediated killing	Second most enriched score: 0.71
3	C11orf74	Sensitive to T cell-mediated killing	Second most enriched score: 0.71
3	ROM1	Sensitive to T cell-mediated killing	Second most enriched score: 0.71
3	HNRNPAB	Sensitive to T cell-mediated killing	Second most enriched score: 0.71
3	APH1A	Sensitive to T cell-mediated killing	Second most enriched score: 0.71
3	DHRS4L2	Sensitive to T cell-mediated killing	Second most enriched score: 0.71
3	RPTOR	Sensitive to T cell-mediated killing	Second most enriched score: 0.71
3	SP1	Sensitive to T cell-mediated killing	Second most enriched score: 0.7
3	LRTM2	Sensitive to T cell-mediated killing	Second most enriched score: 0.7
3	IRF2	Sensitive to T cell-mediated killing	Second most enriched score: 0.7
3	RAET1L	Sensitive to T cell-mediated killing	Second most enriched score: 0.69
3	KANSL1L	Sensitive to T cell-mediated killing	Second most enriched score: 0.69
3	INCENP	Sensitive to T cell-mediated killing	Second most enriched score: 0.68
3	RAD1	Sensitive to T cell-mediated killing	Second most enriched score: 0.68
3	SKA3	Sensitive to T cell-mediated killing	Second most enriched score: 0.68
3	IFNA8	Sensitive to T cell-mediated killing	Second most enriched score: 0.67
3	TSR1	Sensitive to T cell-mediated killing	Second most enriched score: 0.67
3	ST18	Sensitive to T cell-mediated killing	Second most enriched score: 0.67
3	SFTPA2	Sensitive to T cell-mediated killing	Second most enriched score: 0.67
3	PTK7	Sensitive to T cell-mediated killing	Second most enriched score: 0.67
3	LILRA3	Sensitive to T cell-mediated killing	Second most enriched score: 0.67
3	SEMA6B	Sensitive to T cell-mediated killing	Second most enriched score: 0.67
3	GPN1	Sensitive to T cell-mediated killing	Second most enriched score: 0.66
3	MSN	Sensitive to T cell-mediated killing	Second most enriched score: 0.66
3	SMARCB1	Sensitive to T cell-mediated killing	Second most enriched score: 0.66
3	RPL8	Sensitive to T cell-mediated killing	Second most enriched score: 0.66
3	RPL15	Sensitive to T cell-mediated killing	Second most enriched score: 0.66
3	FOXM1	Sensitive to T cell-mediated killing	Second most enriched score: 0.66
3	INPP4B	Sensitive to T cell-mediated killing	Second most enriched score: 0.66
3	KRTAP24-1	Sensitive to T cell-mediated killing	Second most enriched score: 0.66
3	TAF8	Sensitive to T cell-mediated killing	Second most enriched score: 0.66
3	OTC	Sensitive to T cell-mediated killing	Second most enriched score: 0.66
3	TBP	Sensitive to T cell-mediated killing	Second most enriched score: 0.66
3	VN1R1	Sensitive to T cell-mediated killing	Second most enriched score: 0.66
3	WDR74	Sensitive to T cell-mediated killing	Second most enriched score: 0.66
3	TCHHL1	Sensitive to T cell-mediated killing	Second most enriched score: 0.65
3	RPL3	Sensitive to T cell-mediated killing	Second most enriched score: 0.65
3	BRAF	Sensitive to T cell-mediated killing	Second most enriched score: 0.65
3	NR4A3	Sensitive to T cell-mediated killing	Second most enriched score: 0.65
3	CCP110	Sensitive to T cell-mediated killing	Second most enriched score: 0.65
3	SYTL2	Sensitive to T cell-mediated killing	Second most enriched score: 0.65
3	U2SURP	Sensitive to T cell-mediated killing	Second most enriched score: 0.65
3	TAF7	Sensitive to T cell-mediated killing	Second most enriched score: 0.65
3	NLGN3	Sensitive to T cell-mediated killing	Second most enriched score: 0.65
3	WAC	Sensitive to T cell-mediated killing	Second most enriched score: 0.65
3	USP10	Sensitive to T cell-mediated killing	Second most enriched score: 0.65
3	ARHGEF18	Sensitive to T cell-mediated killing	Second most enriched score: 0.65
3	CENPF	Sensitive to T cell-mediated killing	Second most enriched score: 0.65
3	SULT1A1	Sensitive to T cell-mediated killing	Second most enriched score: 0.65
3	GLTSCR2	Sensitive to T cell-mediated killing	Second most enriched score: 0.65
3	NUP93	Sensitive to T cell-mediated killing	Second most enriched score: 0.65
3	SPRY4	Sensitive to T cell-mediated killing	Second most enriched score: 0.65
3	ELP4	Sensitive to T cell-mediated killing	Second most enriched score: 0.65
3	VPS37D	Sensitive to T cell-mediated killing	Second most enriched score: 0.65
3	PSORS1C1	Sensitive to T cell-mediated killing	Second most enriched score: 0.64
3	CKMT1B	Sensitive to T cell-mediated killing	Second most enriched score: 0.64
3	TRAK1	Sensitive to T cell-mediated killing	Second most enriched score: 0.64
3	PROM2	Sensitive to T cell-mediated killing	Second most enriched score: 0.64
3	PSMD14	Sensitive to T cell-mediated killing	Second most enriched score: 0.64
3	LIMD1	Sensitive to T cell-mediated killing	Second most enriched score: 0.64
3	ZNF430	Sensitive to T cell-mediated killing	Second most enriched score: 0.64
3	GTF2H5	Sensitive to T cell-mediated killing	Second most enriched score: 0.63
3	WDR33	Sensitive to T cell-mediated killing	Second most enriched score: 0.63
3	EEF1B2	Sensitive to T cell-mediated killing	Second most enriched score: 0.63
3	MICALCL	Sensitive to T cell-mediated killing	Second most enriched score: 0.63
3	HIST1H2AI	Sensitive to T cell-mediated killing	Second most enriched score: 0.63
3	CETN1	Sensitive to T cell-mediated killing	Second most enriched score: 0.63
3	OPCML	Sensitive to T cell-mediated killing	Second most enriched score: 0.63
3	RFPL4B	Sensitive to T cell-mediated killing	Second most enriched score: 0.63
3	CNTD1	Sensitive to T cell-mediated killing	Second most enriched score: 0.63
3	TXNL4A	Sensitive to T cell-mediated killing	Second most enriched score: 0.63
3	DNASE1L3	Sensitive to T cell-mediated killing	Second most enriched score: 0.63
3	UNC79	Sensitive to T cell-mediated killing	Second most enriched score: 0.63
3	TPST2	Sensitive to T cell-mediated killing	Second most enriched score: 0.63
3	MLEC	Sensitive to T cell-mediated killing	Second most enriched score: 0.63
3	ZC3H12C	Sensitive to T cell-mediated killing	Second most enriched score: 0.63
3	VPS8	Sensitive to T cell-mediated killing	Second most enriched score: 0.63
3	NELFE	Sensitive to T cell-mediated killing	Second most enriched score: 0.62
3	ACAD9	Sensitive to T cell-mediated killing	Second most enriched score: 0.62
3	NCBP2	Sensitive to T cell-mediated killing	Second most enriched score: 0.62
3	C11orf85	Sensitive to T cell-mediated killing	Second most enriched score: 0.62
3	ANG	Sensitive to T cell-mediated killing	Second most enriched score: 0.62
3	JAK2	Sensitive to T cell-mediated killing	Second most enriched score: 0.62
3	ZNF154	Sensitive to T cell-mediated killing	Second most enriched score: 0.62
3	CHCHD7	Sensitive to T cell-mediated killing	Second most enriched score: 0.62
3	LPHN2	Sensitive to T cell-mediated killing	Second most enriched score: 0.62
3	USP31	Sensitive to T cell-mediated killing	Second most enriched score: 0.62
3	DSCR3	Sensitive to T cell-mediated killing	Second most enriched score: 0.62
3	STYXL1	Sensitive to T cell-mediated killing	Second most enriched score: 0.62
3	TMEM134	Sensitive to T cell-mediated killing	Second most enriched score: 0.61
3	RAD21	Sensitive to T cell-mediated killing	Second most enriched score: 0.61
3	ATXN2L	Sensitive to T cell-mediated killing	Second most enriched score: 0.61
3	PTPRQ	Sensitive to T cell-mediated killing	Second most enriched score: 0.61
3	NFIC	Sensitive to T cell-mediated killing	Second most enriched score: 0.61
3	RNF39	Sensitive to T cell-mediated killing	Second most enriched score: 0.61
3	NELFB	Sensitive to T cell-mediated killing	Second most enriched score: 0.61
3	IFNGR2	Sensitive to T cell-mediated killing	Second most enriched score: 0.61
3	LUZP4	Sensitive to T cell-mediated killing	Second most enriched score: 0.61
3	NID2	Sensitive to T cell-mediated killing	Second most enriched score: 0.61
3	CDC7	Sensitive to T cell-mediated killing	Second most enriched score: 0.61
3	HIST1H2BO	Sensitive to T cell-mediated killing	Second most enriched score: 0.61
3	EIF2S1	Sensitive to T cell-mediated killing	Second most enriched score: 0.61
3	SLC23A3	Sensitive to T cell-mediated killing	Second most enriched score: 0.61
3	SRP19	Sensitive to T cell-mediated killing	Second most enriched score: 0.61
3	AURKB	Sensitive to T cell-mediated killing	Second most enriched score: 0.61
3	STK40	Sensitive to T cell-mediated killing	Second most enriched score: 0.61
3	RPL35A	Sensitive to T cell-mediated killing	Second most enriched score: 0.61
3	ADM5	Sensitive to T cell-mediated killing	Second most enriched score: 0.61
3	PRG2	Sensitive to T cell-mediated killing	Second most enriched score: 0.6
3	RPS29	Sensitive to T cell-mediated killing	Second most enriched score: 0.6
3	FAM53B	Sensitive to T cell-mediated killing	Second most enriched score: 0.6
3	LBR	Sensitive to T cell-mediated killing	Second most enriched score: 0.6
3	MPG	Sensitive to T cell-mediated killing	Second most enriched score: 0.6
3	RPLP1	Sensitive to T cell-mediated killing	Second most enriched score: 0.6
3	LDLRAD3	Sensitive to T cell-mediated killing	Second most enriched score: 0.6
3	ATP6V0C	Sensitive to T cell-mediated killing	Second most enriched score: 0.6
3	ZNF619	Sensitive to T cell-mediated killing	Second most enriched score: 0.6
3	GPR116	Sensitive to T cell-mediated killing	Second most enriched score: 0.6
3	EIF3L	Sensitive to T cell-mediated killing	Second most enriched score: 0.6
3	C5orf54	Sensitive to T cell-mediated killing	Second most enriched score: 0.6
3	FIP1L1	Sensitive to T cell-mediated killing	Second most enriched score: 0.6
3	RNF146	Sensitive to T cell-mediated killing	Second most enriched score: 0.6
3	TRIM23	Sensitive to T cell-mediated killing	Second most enriched score: 0.6
3	PLA2G4B	Sensitive to T cell-mediated killing	Second most enriched score: 0.6
3	SETD9	Sensitive to T cell-mediated killing	Second most enriched score: 0.59
3	AATF	Sensitive to T cell-mediated killing	Second most enriched score: 0.59
3	MYC	Sensitive to T cell-mediated killing	Second most enriched score: 0.59
3	CENPC1	Sensitive to T cell-mediated killing	Second most enriched score: 0.59
3	PSMC2	Sensitive to T cell-mediated killing	Second most enriched score: 0.59
3	B3GALT4	Sensitive to T cell-mediated killing	Second most enriched score: 0.59
3	WWTR1	Sensitive to T cell-mediated killing	Second most enriched score: 0.59
3	CALR	Sensitive to T cell-mediated killing	Second most enriched score: 0.59
3	SCAMP2	Sensitive to T cell-mediated killing	Second most enriched score: 0.59
3	C6orf52	Sensitive to T cell-mediated killing	Second most enriched score: 0.59
3	TGIF2LX	Sensitive to T cell-mediated killing	Second most enriched score: 0.59
3	RRAGA	Sensitive to T cell-mediated killing	Second most enriched score: 0.59
3	ZNF566	Sensitive to T cell-mediated killing	Second most enriched score: 0.59
3	RPL7A	Sensitive to T cell-mediated killing	Second most enriched score: 0.59
3	ZKSCAN2	Sensitive to T cell-mediated killing	Second most enriched score: 0.59
3	HECTD2	Sensitive to T cell-mediated killing	Second most enriched score: 0.59
3	ARID2	Sensitive to T cell-mediated killing	Second most enriched score: 0.59
3	RECQL4	Sensitive to T cell-mediated killing	Second most enriched score: 0.59
3	ERH	Sensitive to T cell-mediated killing	Second most enriched score: 0.59
3	AP2S1	Sensitive to T cell-mediated killing	Second most enriched score: 0.59
3	ZNF519	Sensitive to T cell-mediated killing	Second most enriched score: 0.59
3	SV2B	Sensitive to T cell-mediated killing	Second most enriched score: 0.59
3	MLF1	Sensitive to T cell-mediated killing	Second most enriched score: 0.59
3	KLF2	Sensitive to T cell-mediated killing	Second most enriched score: 0.59
3	TNFSF9	Sensitive to T cell-mediated killing	Second most enriched score: 0.58
3	TMEM230	Sensitive to T cell-mediated killing	Second most enriched score: 0.58
3	C8orf59	Sensitive to T cell-mediated killing	Second most enriched score: 0.58
3	LAMB1	Sensitive to T cell-mediated killing	Second most enriched score: 0.58
3	RRP36	Sensitive to T cell-mediated killing	Second most enriched score: 0.58
3	MKI67IP	Sensitive to T cell-mediated killing	Second most enriched score: 0.58
3	SHISA4	Sensitive to T cell-mediated killing	Second most enriched score: 0.58
3	RNF20	Sensitive to T cell-mediated killing	Second most enriched score: 0.58
3	CDK20	Sensitive to T cell-mediated killing	Second most enriched score: 0.58
3	CRTC1	Sensitive to T cell-mediated killing	Second most enriched score: 0.58
3	FARSB	Sensitive to T cell-mediated killing	Second most enriched score: 0.58
3	ITPR3	Sensitive to T cell-mediated killing	Second most enriched score: 0.58
3	URI1	Sensitive to T cell-mediated killing	Second most enriched score: 0.58
3	GTPBP3	Sensitive to T cell-mediated killing	Second most enriched score: 0.58
3	MAP3K5	Sensitive to T cell-mediated killing	Second most enriched score: 0.58
3	GRSF1	Sensitive to T cell-mediated killing	Second most enriched score: 0.57
3	SPPL2C	Sensitive to T cell-mediated killing	Second most enriched score: 0.57
3	SPAG1	Sensitive to T cell-mediated killing	Second most enriched score: 0.57
3	CPSF4	Sensitive to T cell-mediated killing	Second most enriched score: 0.57
3	RBBP5	Sensitive to T cell-mediated killing	Second most enriched score: 0.57
3	BMP8A	Sensitive to T cell-mediated killing	Second most enriched score: 0.57
3	MYF6	Sensitive to T cell-mediated killing	Second most enriched score: 0.57
3	NR2F6	Sensitive to T cell-mediated killing	Second most enriched score: 0.57
3	LOC100862671	Sensitive to T cell-mediated killing	Second most enriched score: 0.57
3	HIST1H1A	Sensitive to T cell-mediated killing	Second most enriched score: 0.57
3	ATXN7L2	Sensitive to T cell-mediated killing	Second most enriched score: 0.57
3	SPATA2	Sensitive to T cell-mediated killing	Second most enriched score: 0.57
3	KPNA1	Sensitive to T cell-mediated killing	Second most enriched score: 0.57
3	CDC73	Sensitive to T cell-mediated killing	Second most enriched score: 0.57
3	FAM98B	Sensitive to T cell-mediated killing	Second most enriched score: 0.57
3	SEC11C	Sensitive to T cell-mediated killing	Second most enriched score: 0.57
3	FAM86C1	Sensitive to T cell-mediated killing	Second most enriched score: 0.57
3	HIVEP1	Sensitive to T cell-mediated killing	Second most enriched score: 0.57
3	LIMA1	Sensitive to T cell-mediated killing	Second most enriched score: 0.57
3	CAPN8	Sensitive to T cell-mediated killing	Second most enriched score: 0.57
3	PTF1A	Sensitive to T cell-mediated killing	Second most enriched score: 0.56
3	B3GAT3	Sensitive to T cell-mediated killing	Second most enriched score: 0.56
3	BARHL2	Sensitive to T cell-mediated killing	Second most enriched score: 0.56
3	NKX6-3	Sensitive to T cell-mediated killing	Second most enriched score: 0.56
3	FSD1	Sensitive to T cell-mediated killing	Second most enriched score: 0.56
3	KCNK5	Sensitive to T cell-mediated killing	Second most enriched score: 0.56
3	HIST1H2BF	Sensitive to T cell-mediated killing	Second most enriched score: 0.56
3	KANSL1	Sensitive to T cell-mediated killing	Second most enriched score: 0.56
3	ZNF433	Sensitive to T cell-mediated killing	Second most enriched score: 0.56
3	ORM1	Sensitive to T cell-mediated killing	Second most enriched score: 0.56
3	EIF4H	Sensitive to T cell-mediated killing	Second most enriched score: 0.56
3	SLC5A9	Sensitive to T cell-mediated killing	Second most enriched score: 0.56
3	GNL2	Sensitive to T cell-mediated killing	Second most enriched score: 0.56
3	RPP25L	Sensitive to T cell-mediated killing	Second most enriched score: 0.56
3	HCLS1	Sensitive to T cell-mediated killing	Second most enriched score: 0.56
3	KRT37	Sensitive to T cell-mediated killing	Second most enriched score: 0.56
3	KRTAP5-1	Sensitive to T cell-mediated killing	Second most enriched score: 0.56
3	LILRA1	Sensitive to T cell-mediated killing	Second most enriched score: 0.56
3	ELAVL1	Sensitive to T cell-mediated killing	Second most enriched score: 0.56
3	TMED5	Sensitive to T cell-mediated killing	Second most enriched score: 0.56
3	NAPG	Sensitive to T cell-mediated killing	Second most enriched score: 0.56
3	SNRPE	Sensitive to T cell-mediated killing	Second most enriched score: 0.56
3	MED16	Sensitive to T cell-mediated killing	Second most enriched score: 0.56
3	PPP4C	Sensitive to T cell-mediated killing	Second most enriched score: 0.55
3	C16orf3	Sensitive to T cell-mediated killing	Second most enriched score: 0.55
3	MPLKIP	Sensitive to T cell-mediated killing	Second most enriched score: 0.55
3	C6orf136	Sensitive to T cell-mediated killing	Second most enriched score: 0.55
3	CTBP1	Sensitive to T cell-mediated killing	Second most enriched score: 0.55
3	RPL21	Sensitive to T cell-mediated killing	Second most enriched score: 0.55
3	TTPAL	Sensitive to T cell-mediated killing	Second most enriched score: 0.55
3	PICALM	Sensitive to T cell-mediated killing	Second most enriched score: 0.55
3	RPLP0	Sensitive to T cell-mediated killing	Second most enriched score: 0.55
3	WDR4	Sensitive to T cell-mediated killing	Second most enriched score: 0.55
3	ERBB2IP	Sensitive to T cell-mediated killing	Second most enriched score: 0.55
3	CDK3	Sensitive to T cell-mediated killing	Second most enriched score: 0.55
3	CWC22	Sensitive to T cell-mediated killing	Second most enriched score: 0.55
3	H2AFZ	Sensitive to T cell-mediated killing	Second most enriched score: 0.55
3	TAF1L	Sensitive to T cell-mediated killing	Second most enriched score: 0.55
3	COG8	Sensitive to T cell-mediated killing	Second most enriched score: 0.55
3	SPDEF	Sensitive to T cell-mediated killing	Second most enriched score: 0.55
3	SMC3	Sensitive to T cell-mediated killing	Second most enriched score: 0.55
3	CASP7	Sensitive to T cell-mediated killing	Second most enriched score: 0.55
3	GPR112	Sensitive to T cell-mediated killing	Second most enriched score: 0.55
3	FARSA	Sensitive to T cell-mediated killing	Second most enriched score: 0.55
3	ZNF561	Sensitive to T cell-mediated killing	Second most enriched score: 0.55
3	OS9	Sensitive to T cell-mediated killing	Second most enriched score: 0.55
3	CAPZA3	Sensitive to T cell-mediated killing	Second most enriched score: 0.54
3	RUNX1T1	Sensitive to T cell-mediated killing	Second most enriched score: 0.54
3	ICAM1	Sensitive to T cell-mediated killing	Second most enriched score: 0.54
3	NHLRC4	Sensitive to T cell-mediated killing	Second most enriched score: 0.54
3	MYH9	Sensitive to T cell-mediated killing	Second most enriched score: 0.54
3	ZFYVE28	Sensitive to T cell-mediated killing	Second most enriched score: 0.54
3	CRCP	Sensitive to T cell-mediated killing	Second most enriched score: 0.54
3	PHF1	Sensitive to T cell-mediated killing	Second most enriched score: 0.54
3	RRS1	Sensitive to T cell-mediated killing	Second most enriched score: 0.54
3	S100G	Sensitive to T cell-mediated killing	Second most enriched score: 0.54
3	CYP4F11	Sensitive to T cell-mediated killing	Second most enriched score: 0.54
3	APOBEC2	Sensitive to T cell-mediated killing	Second most enriched score: 0.54
3	UBE2K	Sensitive to T cell-mediated killing	Second most enriched score: 0.54
3	MRPL14	Sensitive to T cell-mediated killing	Second most enriched score: 0.54
3	UCKL1	Sensitive to T cell-mediated killing	Second most enriched score: 0.54
3	SQSTM1	Sensitive to T cell-mediated killing	Second most enriched score: 0.54
3	PROL1	Sensitive to T cell-mediated killing	Second most enriched score: 0.54
3	LRFN3	Sensitive to T cell-mediated killing	Second most enriched score: 0.54
3	DYRK1A	Sensitive to T cell-mediated killing	Second most enriched score: 0.54
3	APMAP	Sensitive to T cell-mediated killing	Second most enriched score: 0.54
3	ZNF124	Sensitive to T cell-mediated killing	Second most enriched score: 0.54
3	MUC1	Sensitive to T cell-mediated killing	Second most enriched score: 0.54
3	BCORL1	Sensitive to T cell-mediated killing	Second most enriched score: 0.54
3	MITF	Sensitive to T cell-mediated killing	Second most enriched score: 0.54
3	SCD	Sensitive to T cell-mediated killing	Second most enriched score: 0.54
3	MAT2B	Sensitive to T cell-mediated killing	Second most enriched score: 0.54
3	UXS1	Sensitive to T cell-mediated killing	Second most enriched score: 0.54
3	GPBP1L1	Sensitive to T cell-mediated killing	Second most enriched score: 0.54
3	GNRH1	Sensitive to T cell-mediated killing	Second most enriched score: 0.54
3	HLA-F	Sensitive to T cell-mediated killing	Second most enriched score: 0.54
3	SUPT4H1	Sensitive to T cell-mediated killing	Second most enriched score: 0.54
3	TEX35	Sensitive to T cell-mediated killing	Second most enriched score: 0.54
3	CYP2A7	Sensitive to T cell-mediated killing	Second most enriched score: 0.54
3	COCH	Sensitive to T cell-mediated killing	Second most enriched score: 0.54
3	ZNF850	Sensitive to T cell-mediated killing	Second most enriched score: 0.54
3	QARS	Sensitive to T cell-mediated killing	Second most enriched score: 0.54
3	PRDX1	Sensitive to T cell-mediated killing	Second most enriched score: 0.54
3	MAP7D3	Sensitive to T cell-mediated killing	Second most enriched score: 0.54
3	SRP9	Sensitive to T cell-mediated killing	Second most enriched score: 0.54
3	CA9	Sensitive to T cell-mediated killing	Second most enriched score: 0.54
3	OR51Q1	Sensitive to T cell-mediated killing	Second most enriched score: 0.54
3	EVPL	Sensitive to T cell-mediated killing	Second most enriched score: 0.54
3	DPM2	Sensitive to T cell-mediated killing	Second most enriched score: 0.54
3	CTNNA1	Sensitive to T cell-mediated killing	Second most enriched score: 0.53
3	MED12	Sensitive to T cell-mediated killing	Second most enriched score: 0.53
3	TAF1	Sensitive to T cell-mediated killing	Second most enriched score: 0.53
3	F10	Sensitive to T cell-mediated killing	Second most enriched score: 0.53
3	C5orf47	Sensitive to T cell-mediated killing	Second most enriched score: 0.53
3	RPL22L1	Sensitive to T cell-mediated killing	Second most enriched score: 0.53
3	MLL4	Sensitive to T cell-mediated killing	Second most enriched score: 0.53
3	LAMTOR5	Sensitive to T cell-mediated killing	Second most enriched score: 0.53
3	C12orf56	Sensitive to T cell-mediated killing	Second most enriched score: 0.53
3	MLYCD	Sensitive to T cell-mediated killing	Second most enriched score: 0.53
3	TMC3	Sensitive to T cell-mediated killing	Second most enriched score: 0.53
3	DHH	Sensitive to T cell-mediated killing	Second most enriched score: 0.53
3	ATP5J	Sensitive to T cell-mediated killing	Second most enriched score: 0.53
3	CCKAR	Sensitive to T cell-mediated killing	Second most enriched score: 0.53
3	TOR1AIP1	Sensitive to T cell-mediated killing	Second most enriched score: 0.53
3	2023-09-09	Sensitive to T cell-mediated killing	Second most enriched score: 0.53
3	YY1	Sensitive to T cell-mediated killing	Second most enriched score: 0.53
3	CUL5	Sensitive to T cell-mediated killing	Second most enriched score: 0.53
3	RPL34	Sensitive to T cell-mediated killing	Second most enriched score: 0.53
3	FOXO3	Sensitive to T cell-mediated killing	Second most enriched score: 0.53
3	APOO	Sensitive to T cell-mediated killing	Second most enriched score: 0.53
3	NAA30	Sensitive to T cell-mediated killing	Second most enriched score: 0.53
3	TAPBPL	Sensitive to T cell-mediated killing	Second most enriched score: 0.53
3	CCL24	Sensitive to T cell-mediated killing	Second most enriched score: 0.53
3	TP53TG5	Sensitive to T cell-mediated killing	Second most enriched score: 0.53
3	TIMP1	Sensitive to T cell-mediated killing	Second most enriched score: 0.53
3	E2F1	Sensitive to T cell-mediated killing	Second most enriched score: 0.53
3	CCL27	Sensitive to T cell-mediated killing	Second most enriched score: 0.53
3	TLR5	Sensitive to T cell-mediated killing	Second most enriched score: 0.53
3	ZNF728	Sensitive to T cell-mediated killing	Second most enriched score: 0.53
3	LCE1A	Sensitive to T cell-mediated killing	Second most enriched score: 0.53
3	TAZ	Sensitive to T cell-mediated killing	Second most enriched score: 0.53
3	MED24	Sensitive to T cell-mediated killing	Second most enriched score: 0.53
3	MYO1B	Sensitive to T cell-mediated killing	Second most enriched score: 0.53
3	ZSCAN18	Sensitive to T cell-mediated killing	Second most enriched score: 0.52
3	LINGO3	Sensitive to T cell-mediated killing	Second most enriched score: 0.52
3	RPL13	Sensitive to T cell-mediated killing	Second most enriched score: 0.52
3	FZD4	Sensitive to T cell-mediated killing	Second most enriched score: 0.52
3	AMZ2	Sensitive to T cell-mediated killing	Second most enriched score: 0.52
3	PRSS23	Sensitive to T cell-mediated killing	Second most enriched score: 0.52
3	RPAP2	Sensitive to T cell-mediated killing	Second most enriched score: 0.52
3	TRAF1	Sensitive to T cell-mediated killing	Second most enriched score: 0.52
3	GLIPR1L2	Sensitive to T cell-mediated killing	Second most enriched score: 0.52
3	C16orf72	Sensitive to T cell-mediated killing	Second most enriched score: 0.52
3	QKI	Sensitive to T cell-mediated killing	Second most enriched score: 0.52
3	LAIR1	Sensitive to T cell-mediated killing	Second most enriched score: 0.52
3	ZNF689	Sensitive to T cell-mediated killing	Second most enriched score: 0.52
3	PSMC4	Sensitive to T cell-mediated killing	Second most enriched score: 0.52
3	CCDC151	Sensitive to T cell-mediated killing	Second most enriched score: 0.52
3	MAP4K2	Sensitive to T cell-mediated killing	Second most enriched score: 0.52
3	OIP5	Sensitive to T cell-mediated killing	Second most enriched score: 0.52
3	GMIP	Sensitive to T cell-mediated killing	Second most enriched score: 0.52
3	TCEB3	Sensitive to T cell-mediated killing	Second most enriched score: 0.52
3	SELT	Sensitive to T cell-mediated killing	Second most enriched score: 0.52
3	KANSL2	Sensitive to T cell-mediated killing	Second most enriched score: 0.52
3	POU1F1	Sensitive to T cell-mediated killing	Second most enriched score: 0.52
3	SLC4A7	Sensitive to T cell-mediated killing	Second most enriched score: 0.52
3	TMEM209	Sensitive to T cell-mediated killing	Second most enriched score: 0.52
3	SMARCA5	Sensitive to T cell-mediated killing	Second most enriched score: 0.52
3	MCM10	Sensitive to T cell-mediated killing	Second most enriched score: 0.52
3	FLCN	Sensitive to T cell-mediated killing	Second most enriched score: 0.52
3	WBSCR22	Sensitive to T cell-mediated killing	Second most enriched score: 0.52
3	CFDP1	Sensitive to T cell-mediated killing	Second most enriched score: 0.52
3	RPS19	Sensitive to T cell-mediated killing	Second most enriched score: 0.52
3	MED23	Sensitive to T cell-mediated killing	Second most enriched score: 0.52
3	MAGEC3	Sensitive to T cell-mediated killing	Second most enriched score: 0.52
3	TOMM6	Sensitive to T cell-mediated killing	Second most enriched score: 0.52
3	HIST1H2AC	Sensitive to T cell-mediated killing	Second most enriched score: 0.52
3	PAM16	Sensitive to T cell-mediated killing	Second most enriched score: 0.52
3	SYVN1	Sensitive to T cell-mediated killing	Second most enriched score: 0.52
3	MADCAM1	Sensitive to T cell-mediated killing	Second most enriched score: 0.52
3	PODN	Sensitive to T cell-mediated killing	Second most enriched score: 0.52
3	ELP2	Sensitive to T cell-mediated killing	Second most enriched score: 0.52
3	EIF3D	Sensitive to T cell-mediated killing	Second most enriched score: 0.52
3	PRMT2	Sensitive to T cell-mediated killing	Second most enriched score: 0.52
3	CLDN22	Sensitive to T cell-mediated killing	Second most enriched score: 0.52
3	AVPR2	Sensitive to T cell-mediated killing	Second most enriched score: 0.52
3	RARG	Sensitive to T cell-mediated killing	Second most enriched score: 0.51
3	STX17	Sensitive to T cell-mediated killing	Second most enriched score: 0.51
3	ATP6V1G3	Sensitive to T cell-mediated killing	Second most enriched score: 0.51
3	SULT1E1	Sensitive to T cell-mediated killing	Second most enriched score: 0.51
3	CENPQ	Sensitive to T cell-mediated killing	Second most enriched score: 0.51
3	LYPD1	Sensitive to T cell-mediated killing	Second most enriched score: 0.51
3	HOXC11	Sensitive to T cell-mediated killing	Second most enriched score: 0.51
3	KRTAP23-1	Sensitive to T cell-mediated killing	Second most enriched score: 0.51
3	ZNF415	Sensitive to T cell-mediated killing	Second most enriched score: 0.51
3	SAMD15	Sensitive to T cell-mediated killing	Second most enriched score: 0.51
3	TFRC	Sensitive to T cell-mediated killing	Second most enriched score: 0.51
3	LEF1	Sensitive to T cell-mediated killing	Second most enriched score: 0.51
3	SOAT2	Sensitive to T cell-mediated killing	Second most enriched score: 0.51
3	MNF1	Sensitive to T cell-mediated killing	Second most enriched score: 0.51
3	ALDH3B2	Sensitive to T cell-mediated killing	Second most enriched score: 0.51
3	TNIK	Sensitive to T cell-mediated killing	Second most enriched score: 0.51
3	STAM	Sensitive to T cell-mediated killing	Second most enriched score: 0.51
3	MT1B	Sensitive to T cell-mediated killing	Second most enriched score: 0.51
3	UBL5	Sensitive to T cell-mediated killing	Second most enriched score: 0.51
3	OTOA	Sensitive to T cell-mediated killing	Second most enriched score: 0.51
3	TARS	Sensitive to T cell-mediated killing	Second most enriched score: 0.51
3	ODC1	Sensitive to T cell-mediated killing	Second most enriched score: 0.51
3	IARS	Sensitive to T cell-mediated killing	Second most enriched score: 0.51
3	CR2	Sensitive to T cell-mediated killing	Second most enriched score: 0.51
3	IRAK3	Sensitive to T cell-mediated killing	Second most enriched score: 0.51
3	CAPN11	Sensitive to T cell-mediated killing	Second most enriched score: 0.51
3	DOK7	Sensitive to T cell-mediated killing	Second most enriched score: 0.51
3	TCF24	Sensitive to T cell-mediated killing	Second most enriched score: 0.51
3	SLC2A3	Sensitive to T cell-mediated killing	Second most enriched score: 0.51
3	PCDHB7	Sensitive to T cell-mediated killing	Second most enriched score: 0.51
3	OBSCN	Sensitive to T cell-mediated killing	Second most enriched score: 0.51
3	OR52I2	Sensitive to T cell-mediated killing	Second most enriched score: 0.51
3	TSTD2	Sensitive to T cell-mediated killing	Second most enriched score: 0.51
3	SUGP2	Sensitive to T cell-mediated killing	Second most enriched score: 0.51
3	ALG10B	Sensitive to T cell-mediated killing	Second most enriched score: 0.51
3	KIAA1257	Sensitive to T cell-mediated killing	Second most enriched score: 0.51
3	RPL10	Sensitive to T cell-mediated killing	Second most enriched score: 0.51
3	KIF20B	Sensitive to T cell-mediated killing	Second most enriched score: 0.51
3	TMEM14C	Sensitive to T cell-mediated killing	Second most enriched score: 0.51
3	PPARD	Sensitive to T cell-mediated killing	Second most enriched score: 0.51
3	RGP1	Sensitive to T cell-mediated killing	Second most enriched score: 0.51
3	TLR10	Sensitive to T cell-mediated killing	Second most enriched score: 0.51
3	LMBR1L	Sensitive to T cell-mediated killing	Second most enriched score: 0.51
3	HSD17B13	Sensitive to T cell-mediated killing	Second most enriched score: 0.51
3	SULT1A3	Sensitive to T cell-mediated killing	Second most enriched score: 0.51
3	RALGDS	Sensitive to T cell-mediated killing	Second most enriched score: 0.51
3	CCNDBP1	Sensitive to T cell-mediated killing	Second most enriched score: 0.51
3	C6orf106	Sensitive to T cell-mediated killing	Second most enriched score: 0.5
3	CXXC1	Sensitive to T cell-mediated killing	Second most enriched score: 0.5
3	FAM115A	Sensitive to T cell-mediated killing	Second most enriched score: 0.5
3	SLC1A5	Sensitive to T cell-mediated killing	Second most enriched score: 0.5
3	HGSNAT	Sensitive to T cell-mediated killing	Second most enriched score: 0.5
3	BLCAP	Sensitive to T cell-mediated killing	Second most enriched score: 0.5
3	CPSF7	Sensitive to T cell-mediated killing	Second most enriched score: 0.5
3	SLC4A10	Sensitive to T cell-mediated killing	Second most enriched score: 0.5
3	GPSM3	Sensitive to T cell-mediated killing	Second most enriched score: 0.5
3	TBXAS1	Sensitive to T cell-mediated killing	Second most enriched score: 0.5
3	C6orf1	Sensitive to T cell-mediated killing	Second most enriched score: 0.5
3	ATP6V0E1	Sensitive to T cell-mediated killing	Second most enriched score: 0.5
3	TOPAZ1	Sensitive to T cell-mediated killing	Second most enriched score: 0.5
3	C9orf123	Sensitive to T cell-mediated killing	Second most enriched score: 0.5
3	NAT14	Sensitive to T cell-mediated killing	Second most enriched score: 0.5
3	PRTN3	Sensitive to T cell-mediated killing	Second most enriched score: 0.5
4	EIF2AK2	Sensitive to T cell-mediated killing	STARS Score: 10.46; FDR: 0.000
4	IFNAR1	Sensitive to T cell-mediated killing	STARS Score: 9.02; FDR: 0.000
4	IFNAR2	Sensitive to T cell-mediated killing	STARS Score: 8.95; FDR: 0.000
4	STAT1	Sensitive to T cell-mediated killing	STARS Score: 8.89; FDR: 0.000
4	JAK1	Sensitive to T cell-mediated killing	STARS Score: 7.35; FDR: 0.000
4	IFNGR1	Sensitive to T cell-mediated killing	STARS Score: 6.97; FDR: 0.000
4	SAFB	Sensitive to T cell-mediated killing	STARS Score: 6.71; FDR: 0.000
4	PPP1R8	Sensitive to T cell-mediated killing	STARS Score: 6.40; FDR: 0.000
4	IFNGR2	Sensitive to T cell-mediated killing	STARS Score: 5.22; FDR: 0.003
4	CDK5	Sensitive to T cell-mediated killing	STARS Score: 4.95; FDR: 0.006
4	SMARCE1	Sensitive to T cell-mediated killing	STARS Score: 4.86; FDR: 0.007
4	PCBP2	Sensitive to T cell-mediated killing	STARS Score: 4.72; FDR: 0.011
4	SMARCA4	Sensitive to T cell-mediated killing	STARS Score: 4.66; FDR: 0.012
4	VAPA	Sensitive to T cell-mediated killing	STARS Score: 4.62; FDR: 0.012
4	RPS6KB1	Sensitive to T cell-mediated killing	STARS Score: 4.58; FDR: 0.011
4	ANKRD17	Sensitive to T cell-mediated killing	STARS Score: 4.56; FDR: 0.011
4	MSRB1	Sensitive to T cell-mediated killing	STARS Score: 4.55; FDR: 0.011
4	STAT2	Sensitive to T cell-mediated killing	STARS Score: 4.08; FDR: 0.031
4	MSH2	Sensitive to T cell-mediated killing	STARS Score: 4.03; FDR: 0.032
4	ARID1A	Sensitive to T cell-mediated killing	STARS Score: 4.02; FDR: 0.031
4	ELAVL1	Sensitive to T cell-mediated killing	STARS Score: 3.96; FDR: 0.033
4	TNFRSF12A	Sensitive to T cell-mediated killing	STARS Score: 3.96; FDR: 0.032
4	AXIN1	Sensitive to T cell-mediated killing	STARS Score: 3.81; FDR: 0.041
4	SRPK1	Sensitive to T cell-mediated killing	STARS Score: 3.74; FDR: 0.046
4	CHD8	Sensitive to T cell-mediated killing	STARS Score: 3.71; FDR: 0.047
4	SYNPO	Sensitive to T cell-mediated killing	STARS Score: 3.69; FDR: 0.047
4	RIPK1	Resistant to T cell-mediated killing	STARS Score: 8.95; FDR: 0.000
4	IRF1	Resistant to T cell-mediated killing	STARS Score: 8.14; FDR: 0.000
4	HLA-E	Resistant to T cell-mediated killing	STARS Score: 7.75; FDR: 0.001
4	ADAR	Resistant to T cell-mediated killing	STARS Score: 7.58; FDR: 0.001
4	PDIA3	Resistant to T cell-mediated killing	STARS Score: 7.56; FDR: 0.000
4	CALR	Resistant to T cell-mediated killing	STARS Score: 7.55; FDR: 0.000
4	TAP2	Resistant to T cell-mediated killing	STARS Score: 7.10; FDR: 0.000
4	PRMT7	Resistant to T cell-mediated killing	STARS Score: 6.60; FDR: 0.000
4	PPP1R15A	Resistant to T cell-mediated killing	STARS Score: 6.49; FDR: 0.000
4	PTPN2	Resistant to T cell-mediated killing	STARS Score: 6.45; FDR: 0.000
4	PCIF1	Resistant to T cell-mediated killing	STARS Score: 6.44; FDR: 0.000
4	STUB1	Resistant to T cell-mediated killing	STARS Score: 6.31; FDR: 0.000
4	BIRC2	Resistant to T cell-mediated killing	STARS Score: 6.26; FDR: 0.000
4	TBK1	Resistant to T cell-mediated killing	STARS Score: 6.07; FDR: 0.000
4	TAP1	Resistant to T cell-mediated killing	STARS Score: 6.00; FDR: 0.000
4	TRAF3	Resistant to T cell-mediated killing	STARS Score: 5.79; FDR: 0.000
4	GPI	Resistant to T cell-mediated killing	STARS Score: 5.48; FDR: 0.001
4	ERAP1	Resistant to T cell-mediated killing	STARS Score: 5.48; FDR: 0.001
4	TAPBP	Resistant to T cell-mediated killing	STARS Score: 5.36; FDR: 0.001
4	CDC7	Resistant to T cell-mediated killing	STARS Score: 5.29; FDR: 0.001
4	RNF31	Resistant to T cell-mediated killing	STARS Score: 5.20; FDR: 0.002
4	UBQLN1	Resistant to T cell-mediated killing	STARS Score: 5.13; FDR: 0.002
4	CD47	Resistant to T cell-mediated killing	STARS Score: 5.03; FDR: 0.002
4	ZC3HAV1	Resistant to T cell-mediated killing	STARS Score: 5.02; FDR: 0.002
4	PSENEN	Resistant to T cell-mediated killing	STARS Score: 5.01; FDR: 0.002
4	MAEA	Resistant to T cell-mediated killing	STARS Score: 4.88; FDR: 0.003
4	NCSTN	Resistant to T cell-mediated killing	STARS Score: 4.80; FDR: 0.004
4	ADRM1	Resistant to T cell-mediated killing	STARS Score: 4.67; FDR: 0.005
4	ADNP	Resistant to T cell-mediated killing	STARS Score: 4.53; FDR: 0.008
4	RBCK1	Resistant to T cell-mediated killing	STARS Score: 4.32; FDR: 0.012
4	OTULIN	Resistant to T cell-mediated killing	STARS Score: 4.25; FDR: 0.013
4	YWHAZ	Resistant to T cell-mediated killing	STARS Score: 4.17; FDR: 0.014
4	SCRIB	Resistant to T cell-mediated killing	STARS Score: 4.14; FDR: 0.015
4	ATF4	Resistant to T cell-mediated killing	STARS Score: 4.13; FDR: 0.014
4	CR1L	Resistant to T cell-mediated killing	STARS Score: 4.07; FDR: 0.017
4	CEBPG	Resistant to T cell-mediated killing	STARS Score: 4.04; FDR: 0.017
4	GPAA1	Resistant to T cell-mediated killing	STARS Score: 4.03; FDR: 0.018
4	KDM5A	Resistant to T cell-mediated killing	STARS Score: 3.94; FDR: 0.021
4	SETDB1	Resistant to T cell-mediated killing	STARS Score: 3.87; FDR: 0.023
4	TRAF6	Resistant to T cell-mediated killing	STARS Score: 3.85; FDR: 0.024
4	SOCS1	Resistant to T cell-mediated killing	STARS Score: 3.80; FDR: 0.026
4	SEPHS1	Resistant to T cell-mediated killing	STARS Score: 3.80; FDR: 0.026
4	RER1	Resistant to T cell-mediated killing	STARS Score: 3.71; FDR: 0.031
4	TSC1	Resistant to T cell-mediated killing	STARS Score: 3.66; FDR: 0.035
4	GNG12	Resistant to T cell-mediated killing	STARS Score: 3.53; FDR: 0.044
5	EIF2AK2	Sensitive to T cell-mediated killing	STARS Score: 12.37; FDR: 0.000
5	IFNAR2	Sensitive to T cell-mediated killing	STARS Score: 7.84; FDR: 0.000
5	IFNAR1	Sensitive to T cell-mediated killing	STARS Score: 7.37; FDR: 0.000
5	STAT1	Sensitive to T cell-mediated killing	STARS Score: 6.51; FDR: 0.000
5	JAK1	Sensitive to T cell-mediated killing	STARS Score: 6.12; FDR: 0.000
5	SAFB	Sensitive to T cell-mediated killing	STARS Score: 5.09; FDR: 0.006
5	RPS6KB1	Sensitive to T cell-mediated killing	STARS Score: 4.96; FDR: 0.009
5	STAT2	Sensitive to T cell-mediated killing	STARS Score: 4.80; FDR: 0.014
5	SMARCA4	Sensitive to T cell-mediated killing	STARS Score: 4.26; FDR: 0.039
5	RIPK1	Resistant to T cell-mediated killing	STARS Score: 8.57; FDR: 0.000
5	PTPN2	Resistant to T cell-mediated killing	STARS Score: 8.52; FDR: 0.000
5	IRF1	Resistant to T cell-mediated killing	STARS Score: 8.50; FDR: 0.000
5	CALR	Resistant to T cell-mediated killing	STARS Score: 6.89; FDR: 0.001
5	TAP2	Resistant to T cell-mediated killing	STARS Score: 6.62; FDR: 0.001
5	ADAR	Resistant to T cell-mediated killing	STARS Score: 6.58; FDR: 0.001
5	BIRC2	Resistant to T cell-mediated killing	STARS Score: 6.48; FDR: 0.001
5	TAP1	Resistant to T cell-mediated killing	STARS Score: 6.41; FDR: 0.001
5	TRAF3	Resistant to T cell-mediated killing	STARS Score: 6.38; FDR: 0.000
5	NCSTN	Resistant to T cell-mediated killing	STARS Score: 6.01; FDR: 0.001
5	STUB1	Resistant to T cell-mediated killing	STARS Score: 5.85; FDR: 0.002
5	PPP1R15A	Resistant to T cell-mediated killing	STARS Score: 5.48; FDR: 0.002
5	PCIF1	Resistant to T cell-mediated killing	STARS Score: 5.46; FDR: 0.002
5	XRN1	Resistant to T cell-mediated killing	STARS Score: 5.22; FDR: 0.003
5	ADNP	Resistant to T cell-mediated killing	STARS Score: 5.21; FDR: 0.003
5	CD274	Resistant to T cell-mediated killing	STARS Score: 5.01; FDR: 0.004
5	PDIA3	Resistant to T cell-mediated killing	STARS Score: 4.96; FDR: 0.004
5	CD47	Resistant to T cell-mediated killing	STARS Score: 4.84; FDR: 0.005
5	HSP90B1	Resistant to T cell-mediated killing	STARS Score: 4.82; FDR: 0.005
5	SETDB1	Resistant to T cell-mediated killing	STARS Score: 4.78; FDR: 0.006
5	GNA11	Resistant to T cell-mediated killing	STARS Score: 4.72; FDR: 0.006
5	KDM5A	Resistant to T cell-mediated killing	STARS Score: 4.62; FDR: 0.008
5	PRMT7	Resistant to T cell-mediated killing	STARS Score: 4.61; FDR: 0.008
5	CEBPG	Resistant to T cell-mediated killing	STARS Score: 4.59; FDR: 0.008
5	CR1L	Resistant to T cell-mediated killing	STARS Score: 4.54; FDR: 0.008
5	TBK1	Resistant to T cell-mediated killing	STARS Score: 4.35; FDR: 0.013
5	UBQLN1	Resistant to T cell-mediated killing	STARS Score: 4.35; FDR: 0.013
5	CDK12	Resistant to T cell-mediated killing	STARS Score: 4.28; FDR: 0.015
5	GNG12	Resistant to T cell-mediated killing	STARS Score: 4.23; FDR: 0.016
5	TEAD1	Resistant to T cell-mediated killing	STARS Score: 4.15; FDR: 0.018
5	TAPBP	Resistant to T cell-mediated killing	STARS Score: 4.07; FDR: 0.021
5	PON2	Resistant to T cell-mediated killing	STARS Score: 4.00; FDR: 0.024
5	GNE	Resistant to T cell-mediated killing	STARS Score: 3.96; FDR: 0.025
5	PPP2R1A	Resistant to T cell-mediated killing	STARS Score: 3.94; FDR: 0.025
5	UNC50	Resistant to T cell-mediated killing	STARS Score: 3.90; FDR: 0.026
5	PPP1CB	Resistant to T cell-mediated killing	STARS Score: 3.84; FDR: 0.029
5	TMEM127	Resistant to T cell-mediated killing	STARS Score: 3.83; FDR: 0.029
5	IGSF11	Resistant to T cell-mediated killing	STARS Score: 3.73; FDR: 0.035
5	DNAJC5	Resistant to T cell-mediated killing	STARS Score: 3.65; FDR: 0.041
5	PTPN1	Resistant to T cell-mediated killing	STARS Score: 3.60; FDR: 0.044
5	MAP2K3	Resistant to T cell-mediated killing	STARS Score: 3.56; FDR: 0.048
5	RBCK1	Resistant to T cell-mediated killing	STARS Score: 3.55; FDR: 0.048
5	MAEA	Resistant to T cell-mediated killing	STARS Score: 3.55; FDR: 0.047
5	SMG1	Resistant to T cell-mediated killing	STARS Score: 3.54; FDR: 0.046
6	ENPP2	Sensitive to T cell-mediated killing	NA
6	GRM6	Sensitive to T cell-mediated killing	NA
6	GRK5	Sensitive to T cell-mediated killing	NA
6	OR1G1	Sensitive to T cell-mediated killing	NA
6	CCR2	Sensitive to T cell-mediated killing	NA
6	ADMR	Sensitive to T cell-mediated killing	NA
6	GRM4	Sensitive to T cell-mediated killing	NA
6	MASS1	Sensitive to T cell-mediated killing	NA
6	CXCL9	Sensitive to T cell-mediated killing	NA
6	CXCR3	Sensitive to T cell-mediated killing	NA
6	OR1D4	Sensitive to T cell-mediated killing	NA
6	CCR9	Resistant to T cell-mediated killing	NA
6	GHRHR	Resistant to T cell-mediated killing	NA
6	FLJ31393	Resistant to T cell-mediated killing	NA
6	FZD3	Resistant to T cell-mediated killing	NA
6	OR3A2	Resistant to T cell-mediated killing	NA
6	CXCL3	Resistant to T cell-mediated killing	NA
6	VN1R4	Resistant to T cell-mediated killing	NA
6	GNRHR2	Resistant to T cell-mediated killing	NA
6	IL8	Resistant to T cell-mediated killing	NA
6	HTR1D	Resistant to T cell-mediated killing	NA
6	CCL23	Resistant to T cell-mediated killing	NA
6	CCL2	Resistant to T cell-mediated killing	NA
6	P2RY11	Resistant to T cell-mediated killing	NA
6	TRHDE	Resistant to T cell-mediated killing	NA
6	CEACAM6	Resistant to T cell-mediated killing	NA
6	CCR7	Resistant to T cell-mediated killing	NA
6	IL8RA	Resistant to T cell-mediated killing	NA
6	GPR34	Resistant to T cell-mediated killing	NA
6	TACR2	Resistant to T cell-mediated killing	NA
6	GPR43	Resistant to T cell-mediated killing	NA
6	OR1F1	Resistant to T cell-mediated killing	NA
6	GCG	Resistant to T cell-mediated killing	NA
6	CD274	Resistant to T cell-mediated killing	NA
6	GRK6	Resistant to T cell-mediated killing	NA
6	TRAR5	Resistant to T cell-mediated killing	NA
6	TRAR3	Resistant to T cell-mediated killing	NA
6	OR2J2	Resistant to T cell-mediated killing	NA
7	ACVR1C	Resistant to T cell-mediated killing	Total # shRNA with >= 4-fold: 1
7	AK1	Resistant to T cell-mediated killing	Total # shRNA with >= 4-fold: 1
7	AKAP14	Resistant to T cell-mediated killing	Total # shRNA with >= 4-fold: 1
7	AKAP8L	Resistant to T cell-mediated killing	Total # shRNA with >= 4-fold: 1
7	ALK	Resistant to T cell-mediated killing	Total # shRNA with >= 4-fold: 1
7	AURKB	Resistant to T cell-mediated killing	Total # shRNA with >= 4-fold: 1
7	BLVRA	Resistant to T cell-mediated killing	Total # shRNA with >= 4-fold: 1
7	BLVRB	Resistant to T cell-mediated killing	Total # shRNA with >= 4-fold: 1
7	BTG2	Resistant to T cell-mediated killing	Total # shRNA with >= 4-fold: 1
7	CASK	Resistant to T cell-mediated killing	Total # shRNA with >= 4-fold: 1
7	CASS4	Resistant to T cell-mediated killing	Total # shRNA with >= 4-fold: 1
7	CAT	Resistant to T cell-mediated killing	Total # shRNA with >= 4-fold: 1
7	CBLB	Resistant to T cell-mediated killing	Total # shRNA with >= 4-fold: 1
7	CCL1	Resistant to T cell-mediated killing	Total # shRNA with >= 4-fold: 1
7	CDK9	Resistant to T cell-mediated killing	Total # shRNA with >= 4-fold: 1
7	CDKN2A	Resistant to T cell-mediated killing	Total # shRNA with >= 4-fold: 1
7	CNTN6	Resistant to T cell-mediated killing	Total # shRNA with >= 4-fold: 1
7	CXorf56	Resistant to T cell-mediated killing	Total # shRNA with >= 4-fold: 1
7	DCAKD	Resistant to T cell-mediated killing	Total # shRNA with >= 4-fold: 1
7	DGKA	Resistant to T cell-mediated killing	Total # shRNA with >= 4-fold: 1
7	DGKZ	Resistant to T cell-mediated killing	Total # shRNA with >= 4-fold: 1
7	DUSP27	Resistant to T cell-mediated killing	Total # shRNA with >= 4-fold: 1
7	DYRK3	Resistant to T cell-mediated killing	Total # shRNA with >= 4-fold: 1
7	EGR2	Resistant to T cell-mediated killing	Total # shRNA with >= 4-fold: 1
7	ENPP2	Resistant to T cell-mediated killing	Total # shRNA with >= 4-fold: 1
7	ENTPD1	Resistant to T cell-mediated killing	Total # shRNA with >= 4-fold: 1
7	ENTPD6	Resistant to T cell-mediated killing	Total # shRNA with >= 4-fold: 1
7	EPHA8	Resistant to T cell-mediated killing	Total # shRNA with >= 4-fold: 1
7	ERBB2	Resistant to T cell-mediated killing	Total # shRNA with >= 4-fold: 1
7	FGFR2	Resistant to T cell-mediated killing	Total # shRNA with >= 4-fold: 1
7	FGFR4	Resistant to T cell-mediated killing	Total # shRNA with >= 4-fold: 1
7	FLOT2	Resistant to T cell-mediated killing	Total # shRNA with >= 4-fold: 1
7	GTF2H1	Resistant to T cell-mediated killing	Total # shRNA with >= 4-fold: 1
7	GUCY2C	Resistant to T cell-mediated killing	Total # shRNA with >= 4-fold: 1
7	H3F3A	Resistant to T cell-mediated killing	Total # shRNA with >= 4-fold: 1
7	HCK	Resistant to T cell-mediated killing	Total # shRNA with >= 4-fold: 1
7	HINT1	Resistant to T cell-mediated killing	Total # shRNA with >= 4-fold: 1
7	HIPK1	Resistant to T cell-mediated killing	Total # shRNA with >= 4-fold: 1
7	HIPK2	Resistant to T cell-mediated killing	Total # shRNA with >= 4-fold: 1
7	IKBKE	Resistant to T cell-mediated killing	Total # shRNA with >= 4-fold: 1
7	INPP5B	Resistant to T cell-mediated killing	Total # shRNA with >= 4-fold: 1
7	INSR	Resistant to T cell-mediated killing	Total # shRNA with >= 4-fold: 1
7	IPMK	Resistant to T cell-mediated killing	Total # shRNA with >= 4-fold: 1
7	ITPK1	Resistant to T cell-mediated killing	Total # shRNA with >= 4-fold: 1
7	KCNH8	Resistant to T cell-mediated killing	Total # shRNA with >= 4-fold: 1
7	LATS2	Resistant to T cell-mediated killing	Total # shRNA with >= 4-fold: 1
7	LMTK2	Resistant to T cell-mediated killing	Total # shRNA with >= 4-fold: 1
7	LPCAT2	Resistant to T cell-mediated killing	Total # shRNA with >= 4-fold: 1
7	MAP2K2	Resistant to T cell-mediated killing	Total # shRNA with >= 4-fold: 1
7	MAP2K5	Resistant to T cell-mediated killing	Total # shRNA with >= 4-fold: 1
7	MAP3K1	Resistant to T cell-mediated killing	Total # shRNA with >= 4-fold: 1
7	MAPKAP1	Resistant to T cell-mediated killing	Total # shRNA with >= 4-fold: 1
7	MAST2	Resistant to T cell-mediated killing	Total # shRNA with >= 4-fold: 1
7	MDFIC	Resistant to T cell-mediated killing	Total # shRNA with >= 4-fold: 1
7	MPP3	Resistant to T cell-mediated killing	Total # shRNA with >= 4-fold: 1
7	MTMR11	Resistant to T cell-mediated killing	Total # shRNA with >= 4-fold: 1
7	MYLK	Resistant to T cell-mediated killing	Total # shRNA with >= 4-fold: 1
7	NEK11	Resistant to T cell-mediated killing	Total # shRNA with >= 4-fold: 1
7	NEK2	Resistant to T cell-mediated killing	Total # shRNA with >= 4-fold: 1
7	NLK	Resistant to T cell-mediated killing	Total # shRNA with >= 4-fold: 1
7	NME5	Resistant to T cell-mediated killing	Total # shRNA with >= 4-fold: 1
7	NPTXR	Resistant to T cell-mediated killing	Total # shRNA with >= 4-fold: 1
7	NT5C2	Resistant to T cell-mediated killing	Total # shRNA with >= 4-fold: 1
7	NUDT11	Resistant to T cell-mediated killing	Total # shRNA with >= 4-fold: 1
7	PAK1IP1	Resistant to T cell-mediated killing	Total # shRNA with >= 4-fold: 1
7	PDP1	Resistant to T cell-mediated killing	Total # shRNA with >= 4-fold: 1
7	PDZK1IP1	Resistant to T cell-mediated killing	Total # shRNA with >= 4-fold: 1
7	PFKFB3	Resistant to T cell-mediated killing	Total # shRNA with >= 4-fold: 1
7	PFKL	Resistant to T cell-mediated killing	Total # shRNA with >= 4-fold: 1
7	PIK3C3	Resistant to T cell-mediated killing	Total # shRNA with >= 4-fold: 1
7	PKD1	Resistant to T cell-mediated killing	Total # shRNA with >= 4-fold: 1
7	PPM1G	Resistant to T cell-mediated killing	Total # shRNA with >= 4-fold: 1
7	PPM1J	Resistant to T cell-mediated killing	Total # shRNA with >= 4-fold: 1
7	PPM1L	Resistant to T cell-mediated killing	Total # shRNA with >= 4-fold: 1
7	PPP2R3C	Resistant to T cell-mediated killing	Total # shRNA with >= 4-fold: 1
7	PPP3CC	Resistant to T cell-mediated killing	Total # shRNA with >= 4-fold: 1
7	PRKAB2	Resistant to T cell-mediated killing	Total # shRNA with >= 4-fold: 1
7	PRKD2	Resistant to T cell-mediated killing	Total # shRNA with >= 4-fold: 1
7	PTGER4	Resistant to T cell-mediated killing	Total # shRNA with >= 4-fold: 1
7	PTPN1	Resistant to T cell-mediated killing	Total # shRNA with >= 4-fold: 1
7	PTPN14	Resistant to T cell-mediated killing	Total # shRNA with >= 4-fold: 1
7	PTPN2	Resistant to T cell-mediated killing	Total # shRNA with >= 4-fold: 1
7	RIPK2	Resistant to T cell-mediated killing	Total # shRNA with >= 4-fold: 1
7	ROBO1	Resistant to T cell-mediated killing	Total # shRNA with >= 4-fold: 1
7	ROCK1	Resistant to T cell-mediated killing	Total # shRNA with >= 4-fold: 1
7	SBF1	Resistant to T cell-mediated killing	Total # shRNA with >= 4-fold: 1
7	SEMA4D	Resistant to T cell-mediated killing	Total # shRNA with >= 4-fold: 1
7	SEMA7A	Resistant to T cell-mediated killing	Total # shRNA with >= 4-fold: 1
7	SGMS2	Resistant to T cell-mediated killing	Total # shRNA with >= 4-fold: 1
7	SLITRK4	Resistant to T cell-mediated killing	Total # shRNA with >= 4-fold: 1
7	SMAD2	Resistant to T cell-mediated killing	Total # shRNA with >= 4-fold: 1
7	SOCS1	Resistant to T cell-mediated killing	Total # shRNA with >= 4-fold: 1
7	STK11	Resistant to T cell-mediated killing	Total # shRNA with >= 4-fold: 1
7	STK17B	Resistant to T cell-mediated killing	Total # shRNA with >= 4-fold: 1
7	TAP1	Resistant to T cell-mediated killing	Total # shRNA with >= 4-fold: 1
7	TBC1D22A	Resistant to T cell-mediated killing	Total # shRNA with >= 4-fold: 1
7	TSSK2	Resistant to T cell-mediated killing	Total # shRNA with >= 4-fold: 1
7	VAMP7	Resistant to T cell-mediated killing	Total # shRNA with >= 4-fold: 1
7	WNK1	Resistant to T cell-mediated killing	Total # shRNA with >= 4-fold: 1
7	WNT10B	Resistant to T cell-mediated killing	Total # shRNA with >= 4-fold: 1
7	YES1	Resistant to T cell-mediated killing	Total # shRNA with >= 4-fold: 1
7	YPEL2	Resistant to T cell-mediated killing	Total # shRNA with >= 4-fold: 1
7	CDKL3	Resistant to T cell-mediated killing	Total # shRNA with >= 4-fold: 2
7	F11R	Resistant to T cell-mediated killing	Total # shRNA with >= 4-fold: 2
7	FYN	Resistant to T cell-mediated killing	Total # shRNA with >= 4-fold: 2
7	JUN	Resistant to T cell-mediated killing	Total # shRNA with >= 4-fold: 2
7	PPP3R1	Resistant to T cell-mediated killing	Total # shRNA with >= 4-fold: 2
7	SOCS3	Resistant to T cell-mediated killing	Total # shRNA with >= 4-fold: 2
7	STK36	Resistant to T cell-mediated killing	Total # shRNA with >= 4-fold: 2
7	TGFBR1	Resistant to T cell-mediated killing	Total # shRNA with >= 4-fold: 2
8	CAT	Resistant to T cell-mediated killing	Total # shRNA with >= 4-fold: 1
8	CCL1	Resistant to T cell-mediated killing	Total # shRNA with >= 4-fold: 1
8	DCAKD	Resistant to T cell-mediated killing	Total # shRNA with >= 4-fold: 1
8	ENTPD6	Resistant to T cell-mediated killing	Total # shRNA with >= 4-fold: 1
8	FGFR4	Resistant to T cell-mediated killing	Total # shRNA with >= 4-fold: 1
8	FLOT2	Resistant to T cell-mediated killing	Total # shRNA with >= 4-fold: 1
8	FYN	Resistant to T cell-mediated killing	Total # shRNA with >= 4-fold: 1
8	LPCAT2	Resistant to T cell-mediated killing	Total # shRNA with >= 4-fold: 1
8	NME2	Resistant to T cell-mediated killing	Total # shRNA with >= 4-fold: 1
8	NT5C2	Resistant to T cell-mediated killing	Total # shRNA with >= 4-fold: 1
8	PPP2R3C	Resistant to T cell-mediated killing	Total # shRNA with >= 4-fold: 1
8	SEMA4D	Resistant to T cell-mediated killing	Total # shRNA with >= 4-fold: 1
8	TBC1D22A	Resistant to T cell-mediated killing	Total # shRNA with >= 4-fold: 1
8	WNK1	Resistant to T cell-mediated killing	Total # shRNA with >= 4-fold: 1
8	BTG2	Resistant to T cell-mediated killing	Total # shRNA with >= 4-fold: 2
8	CXorf56	Resistant to T cell-mediated killing	Total # shRNA with >= 4-fold: 2
8	H3F3A	Resistant to T cell-mediated killing	Total # shRNA with >= 4-fold: 2
8	INSR	Resistant to T cell-mediated killing	Total # shRNA with >= 4-fold: 2
8	NLK	Resistant to T cell-mediated killing	Total # shRNA with >= 4-fold: 2
8	NME7	Resistant to T cell-mediated killing	Total # shRNA with >= 4-fold: 2
8	PFKFB3	Resistant to T cell-mediated killing	Total # shRNA with >= 4-fold: 2
8	PPM1L	Resistant to T cell-mediated killing	Total # shRNA with >= 4-fold: 2
8	PTGER4	Resistant to T cell-mediated killing	Total # shRNA with >= 4-fold: 2
8	RCOR1	Resistant to T cell-mediated killing	Total # shRNA with >= 4-fold: 2
8	RIPK2	Resistant to T cell-mediated killing	Total # shRNA with >= 4-fold: 2
8	SEMA7A	Resistant to T cell-mediated killing	Total # shRNA with >= 4-fold: 2
8	STK11	Resistant to T cell-mediated killing	Total # shRNA with >= 4-fold: 2
8	TAP1	Resistant to T cell-mediated killing	Total # shRNA with >= 4-fold: 2
8	WNT10B	Resistant to T cell-mediated killing	Total # shRNA with >= 4-fold: 2
8	AKAP8L	Resistant to T cell-mediated killing	Total # shRNA with >= 4-fold: 3
8	ALK	Resistant to T cell-mediated killing	Total # shRNA with >= 4-fold: 3
8	ARHGAP5	Resistant to T cell-mediated killing	Total # shRNA with >= 4-fold: 3
8	BLVRB	Resistant to T cell-mediated killing	Total # shRNA with >= 4-fold: 3
8	ENTPD1	Resistant to T cell-mediated killing	Total # shRNA with >= 4-fold: 3
8	F11R	Resistant to T cell-mediated killing	Total # shRNA with >= 4-fold: 3
8	GSK3B	Resistant to T cell-mediated killing	Total # shRNA with >= 4-fold: 3
8	IPMK	Resistant to T cell-mediated killing	Total # shRNA with >= 4-fold: 3
8	MET	Resistant to T cell-mediated killing	Total # shRNA with >= 4-fold: 3
8	NPTXR	Resistant to T cell-mediated killing	Total # shRNA with >= 4-fold: 3
8	NUAK2	Resistant to T cell-mediated killing	Total # shRNA with >= 4-fold: 3
8	PDP1	Resistant to T cell-mediated killing	Total # shRNA with >= 4-fold: 3
8	PDZK1IP1	Resistant to T cell-mediated killing	Total # shRNA with >= 4-fold: 3
8	PPM1G	Resistant to T cell-mediated killing	Total # shRNA with >= 4-fold: 3
8	PPP3CC	Resistant to T cell-mediated killing	Total # shRNA with >= 4-fold: 3
8	PRKAB2	Resistant to T cell-mediated killing	Total # shRNA with >= 4-fold: 3
8	TNK1	Resistant to T cell-mediated killing	Total # shRNA with >= 4-fold: 3
8	TRPM7	Resistant to T cell-mediated killing	Total # shRNA with >= 4-fold: 3
8	VAMP7	Resistant to T cell-mediated killing	Total # shRNA with >= 4-fold: 3
8	YES1	Resistant to T cell-mediated killing	Total # shRNA with >= 4-fold: 3
8	YPEL2	Resistant to T cell-mediated killing	Total # shRNA with >= 4-fold: 3
8	CDKN2A	Resistant to T cell-mediated killing	Total # shRNA with >= 4-fold: 4
8	DGKA	Resistant to T cell-mediated killing	Total # shRNA with >= 4-fold: 4
8	GRK6	Resistant to T cell-mediated killing	Total # shRNA with >= 4-fold: 4
8	HIPK1	Resistant to T cell-mediated killing	Total # shRNA with >= 4-fold: 4
8	MAST2	Resistant to T cell-mediated killing	Total # shRNA with >= 4-fold: 4
8	MDFIC	Resistant to T cell-mediated killing	Total # shRNA with >= 4-fold: 4
8	ROCK1	Resistant to T cell-mediated killing	Total # shRNA with >= 4-fold: 4
8	SBF1	Resistant to T cell-mediated killing	Total # shRNA with >= 4-fold: 4
8	SOCS3	Resistant to T cell-mediated killing	Total # shRNA with >= 4-fold: 4
8	STK17B	Resistant to T cell-mediated killing	Total # shRNA with >= 4-fold: 4
8	CBLB	Resistant to T cell-mediated killing	Total # shRNA with >= 4-fold: 5
8	EGR2	Resistant to T cell-mediated killing	Total # shRNA with >= 4-fold: 5
8	EIF2AK3	Resistant to T cell-mediated killing	Total # shRNA with >= 4-fold: 5
8	INPP5B	Resistant to T cell-mediated killing	Total # shRNA with >= 4-fold: 5
8	JUN	Resistant to T cell-mediated killing	Total # shRNA with >= 4-fold: 5
8	PPP2R2D	Resistant to T cell-mediated killing	Total # shRNA with >= 4-fold: 5
8	PTPN2	Resistant to T cell-mediated killing	Total # shRNA with >= 4-fold: 5
8	SMAD2	Resistant to T cell-mediated killing	Total # shRNA with >= 4-fold: 5
8	SOCS1	Resistant to T cell-mediated killing	Total # shRNA with >= 4-fold: 5
8	DGKZ	Resistant to T cell-mediated killing	Total # shRNA with >= 4-fold: 6
8	PKD1	Resistant to T cell-mediated killing	Total # shRNA with >= 4-fold: 6
8	RBKS	Resistant to T cell-mediated killing	Total # shRNA with >= 4-fold: 6
